# Supplementary material for: Sterepinic Acids A–C, New Carboxylic Acids Produced by a Marine Alga-Derived Fungus
Source: MDPI journal article supplement (doi:10.3390/molecules23061336), 2018-06-01

# Supplementary Information

## Sterepinic acids A–C, new carboxylic acids produced by a marine alga-derived Fungus

Takeshi Yamada \* Miwa Matsuda, Mayuko Seki, Megumi Hirose and Takashi Kikuchi

|                                                                                 |    |
|---------------------------------------------------------------------------------|----|
| Structures of metabolites in the fungal strain                                  | 2  |
| Table S1 Spectral data including 2D NMR data for 1                              | 3  |
| Table S2 Spectral data including 2D NMR data for 2                              | 4  |
| Table S3 Spectral data including 2D NMR data for 3                              | 5  |
| Table S4 Spectral data including 2D NMR data for 4                              | 6  |
| Figure S1 <sup>1</sup> H NMR spectrum of 1 in CDCl <sub>3</sub>                 | 7  |
| Figure S2 <sup>13</sup> C NMR spectrum of 1 in CDCl <sub>3</sub>                | 8  |
| Figure S3 <sup>1</sup> H- <sup>1</sup> H COSY of 1                              | 9  |
| Figure S4 NOESY of 1                                                            | 10 |
| Figure S5 HMQC of 1                                                             | 11 |
| Figure S6 HMBC of 1                                                             | 12 |
| Figure S7 <sup>1</sup> H NMR spectrum of 2 in CDCl <sub>3</sub>                 | 13 |
| Figure S8 <sup>13</sup> C NMR spectrum of 2 in CDCl <sub>3</sub>                | 14 |
| Figure S9 <sup>1</sup> H- <sup>1</sup> H COSY of 2                              | 15 |
| Figure S10 NOESY of 2                                                           | 16 |
| Figure S11 HMQC of 2                                                            | 17 |
| Figure S12 HMBC of 2                                                            | 18 |
| Figure S13 <sup>1</sup> H NMR spectrum of 3 in CDCl <sub>3</sub>                | 19 |
| Figure S14 <sup>13</sup> C NMR spectrum of 3 in CDCl <sub>3</sub>               | 20 |
| Figure S15 <sup>1</sup> H- <sup>1</sup> H COSY of 3                             | 21 |
| Figure S16 NOESY of 3                                                           | 22 |
| Figure S17 HMQC of 3                                                            | 23 |
| Figure S18 HMBC of 3                                                            | 24 |
| Figure S19 <sup>1</sup> H NMR spectrum of 4 in CDCl <sub>3</sub>                | 25 |
| Figure S20 <sup>13</sup> C NMR spectrum of 4 in CDCl <sub>3</sub>               | 26 |
| Figure S21 <sup>1</sup> H- <sup>1</sup> H COSY of 4                             | 27 |
| Figure S22 NOESY of 4                                                           | 28 |
| Figure S23 HMQC of 4                                                            | 29 |
| Figure S24 HMBC of 4                                                            | 30 |
| Figure S25 <sup>1</sup> H NMR spectra of 1a in CDCl <sub>3</sub>                | 31 |
| Figure S26 <sup>1</sup> H NMR spectra of 1b in CDCl <sub>3</sub>                | 35 |
| Figure S27 <sup>1</sup> H NMR spectra of methyl ester of 1 in CDCl <sub>3</sub> | 38 |



Table S1 NMR spectral data of **1** in CDCl<sub>3</sub>

| Position | $\delta_{\text{H}}^{\text{a}}$ | J/Hz             | $^1\text{H}$ - $^1\text{H}$ COSY | NOESY <sup>b</sup>    | $\delta_{\text{C}}$ | HMBC (C) <sup>c</sup> |
|----------|--------------------------------|------------------|----------------------------------|-----------------------|---------------------|-----------------------|
| 1        |                                |                  |                                  |                       | 177.5 (s)           |                       |
| 2        | 3.27 m                         |                  | 3, 8A, 8B                        | 9, 11, 12             | 44.9 (d)            | 1, 3, 4, 8, 9         |
| 3        | 5.50 d                         | 10.2 (2)         | 2                                | 8A, 8B, 9, 11, 12     | 127.0 (d)           | 1, 2, 5, 7, 8         |
| 4        |                                |                  |                                  |                       | 138.7 (s)           |                       |
| 5A       | 2.25 m                         |                  | 5B, 6                            |                       | 31.9 (t)            | 3, 4, 6, 7            |
| 5B       | 2.49 m                         |                  | 5A, 6                            |                       |                     | 3, 4, 6, 7            |
| 6        | 3.68 br s                      |                  | 5A, 5B                           | 11, 12                | 61.0 (t)            | 4                     |
| 7        | 4.03 br s                      |                  |                                  | 3, 11, 12             | 66.8 (t)            | 3, 4, 5               |
| 8A       | 2.20 m                         |                  | 2, 8B, 9                         | 3, 11, 12             | 30.9 (t)            | 1, 2, 3, 9, 10        |
| 8B       | 2.44 m                         |                  | 2, 8A, 9                         | 3, 11, 12             |                     | 1, 2, 3, 9, 10        |
| 9        | 5.04 dd                        | 7.2 (8), 7.2 (8) | 8A, 8B                           | 2, 3, 11, 12          | 120.2 (d)           | 2, 8, 11, 12          |
| 10       |                                |                  |                                  |                       | 134.1 (s)           |                       |
| 11       | 1.67 s                         |                  |                                  | 2, 3, 6, 7, 8A, 8B, 9 | 25.7 (q)            | 9, 10, 12             |
| 12       | 1.60 s                         |                  |                                  | 2, 3, 6, 7, 8A, 8B, 9 | 17.8 (q)            | 9, 10, 11             |

<sup>a</sup>  $^1\text{H}$  chemical shift values ( $\delta$  ppm from SiMe<sub>4</sub>) followed by multiplicity and then the coupling constants ( $J$ /Hz). Figures in parentheses indicate the proton coupling with that position. <sup>b</sup> The correlations with geminal and vicinal protons are removed. <sup>c</sup> Long range  $^1\text{H}$ - $^{13}\text{C}$  correlations from H to C observed in the HMBC experiment.

Table S2 NMR spectral data of **2** in CDCl<sub>3</sub>

| Position | $\delta_{\text{H}}^{\text{a}}$ |      | J/Hz      | $^1\text{H}$ - $^1\text{H}$ COSY | NOESY <sup>b</sup> | $\delta_{\text{C}}$     | HMBC (C) <sup>c</sup> |
|----------|--------------------------------|------|-----------|----------------------------------|--------------------|-------------------------|-----------------------|
| 1        |                                |      |           |                                  |                    | 173.5 (s)               |                       |
| 2        | 3.28                           | m    |           | 3, 8A, 8B                        | 5, 9               | 45.4 (d)                | 1, 3, 4, 8, 9         |
| 3        | 5.49                           | d    | 10.8 (2)  | 2                                | 7A, 7B, 8A, 8B     | 129.3 (d)               | 2, 5, 7, 8            |
| 4        |                                |      |           |                                  |                    | 133.9 (s)               |                       |
| 5A       | 2.18                           | m    |           | 5B, 6A, 6B                       | 2                  | 32.3 (t)                | 3, 4, 6, 7            |
| 5B       | 2.54                           | m    |           | 5A, 6A, 6B                       | 2                  |                         | 3, 4, 6, 7            |
| 6A       | 3.65                           | br s |           | 5A, 5B, 6B                       |                    | 61.4 (t)                |                       |
| 6B       | 3.72                           | br s |           | 5A, 5B, 6A                       |                    |                         |                       |
| 7A       | 4.48                           | d    | 13.2 (7B) | 7B                               | 3                  | 67.9 (t)                | 1, 3, 4, 5            |
| 7B       | 4.62                           | d    | 13.2 (7A) | 7A                               | 3                  |                         | 1, 3, 4, 5            |
| 8A       | 2.20                           | m    |           | 2, 8B, 9                         | 3, 11, 12          | 30.8 <sup>d1</sup> (t)  | 1, 2, 3, 9, 10        |
| 8B       | 2.46                           | m    |           | 2, 8A, 9                         | 3, 11, 12          |                         | 1, 2, 3, 9, 10        |
| 9        | 5.03                           | m    |           | 8A, 8B                           | 2, 11, 12          | 120.2 <sup>d2</sup> (d) | 2, 8, 11, 12          |
| 10       |                                |      |           |                                  |                    | 134.2 <sup>d3</sup> (s) |                       |
| 11       | 1.67                           | s    |           |                                  | 9                  | 25.7 (q)                | 9, 10, 12             |
| 12       | 1.60                           | s    |           |                                  | 8A, 8B, 9          | 17.8 (q)                | 9, 10, 11             |
| 1'       |                                |      |           |                                  |                    | 173.5 (s)               |                       |
| 2'       | 3.28                           | m    |           | 3', 8'A, 8'B                     | 5', 9'             | 45.4 (d)                | 1', 8', 9'            |
| 3'       | 5.52                           | d    | 10.2 (2') | 2'                               | 7', 8'A, 8'B       | 127.2 (d)               | 5', 7'                |
| 4'       |                                |      |           |                                  |                    | 139.6 (s)               |                       |
| 5'A      | 2.29                           | m    |           | 5'B, 6'                          | 2'                 | 32.3 (t)                | 3', 4', 6', 7'        |
| 5'B      | 2.54                           | m    |           | 5'A, 6'                          | 2'                 |                         | 3', 4', 6', 7'        |
| 6'       | 3.72                           | br s |           | 5'A, 5'B                         |                    | 60.5 (t)                |                       |
| 7'       | 4.05                           | br s |           |                                  | 3'                 | 67.5 (t)                | 3', 4', 5'            |
| 8'A      | 2.20                           | m    |           | 2', 8'B, 9'                      | 3', 11', 12'       | 30.6 <sup>d1</sup> (t)  | 1', 2', 3', 9', 10'   |
| 8'B      | 2.46                           | m    |           | 2', 8'A, 9'                      | 3', 11', 12'       |                         | 1', 2', 3', 9', 10'   |
| 9'       | 5.03                           | m    |           | 8'A, 8'B                         | 2', 11', 12'       | 120.3 <sup>d2</sup> (d) | 2', 8', 11', 12'      |
| 10'      |                                |      |           |                                  |                    | 134.3 <sup>d3</sup> (s) |                       |
| 11'      | 1.67                           | s    |           |                                  | 9'                 | 25.7 (q)                | 9', 10', 12'          |
| 12'      | 1.60                           | s    |           |                                  | 8'A, 8'B, 9'       | 17.8 (q)                | 9', 10', 11'          |

a  $^1\text{H}$  chemical shift values (d ppm from SiMe<sub>4</sub>) followed by multiplicity and then the coupling constants (J/Hz). Figures in parentheses indicate the proton coupling with that position. b The correlations with geminal and vicinal protons are removed. c Long range  $^1\text{H}$ - $^{13}\text{C}$  correlations from H to C observed in the HMBC experiment. d1-d3 interchangeable

Table S3 NMR spectral data of **3** in CDCl<sub>3</sub>

| Position | $\delta_{\text{H}}^{\text{a}}$ |      | J/Hz                        | $^1\text{H}$ - $^1\text{H}$ COSY |                  | NOESY <sup>b</sup> | $\delta_{\text{C}}$     | HMBC (C) <sup>c</sup> |
|----------|--------------------------------|------|-----------------------------|----------------------------------|------------------|--------------------|-------------------------|-----------------------|
| 1        |                                |      |                             |                                  |                  |                    | 174.3 (s)               |                       |
| 2        | 3.28                           | m    |                             | 3, 8A, 8B                        | 5, 9             |                    | 44.9 (d)                | 1, 8, 9               |
| 3        | 5.55                           | d    | 9.6 (2)                     | 2                                | 7, 9             |                    | 129.3 (d)               | 5, 7                  |
| 4        |                                |      |                             |                                  |                  |                    | 137.9 (s)               |                       |
| 5A       | 2.30                           | ddd  | 14.4 (5B), 5.4 (6), 5.4 (6) | 5B, 6                            | 2                |                    | 27.7 (t)                | 3, 4, 6, 7            |
| 5B       | 2.54                           | ddd  | 14.4 (5B), 5.4 (6), 5.4 (6) | 5A, 6                            | 2                |                    |                         | 3, 4, 6, 7            |
| 6        | 4.20                           | m    |                             | 5A, 5B                           |                  |                    | 63.5 (t)                | 1', 4                 |
| 7        | 4.07                           | m    |                             |                                  | 3                |                    | 66.5 (t)                | 3, 4                  |
| 8A       | 2.20                           | m    |                             | 2, 8B, 9                         | 12               |                    | 31.4 (t)                | 1, 2, 3, 9, 10        |
| 8B       | 2.44                           | m    |                             | 2, 8A, 9                         | 12               |                    |                         | 1, 2, 3, 9, 10        |
| 9        | 5.02 <sup>d1</sup>             | dd   | 7.2 (8A), 7.2 (8B)          | 8A, 8B                           | 2, 3, 11         |                    | 120.2 <sup>d2</sup> (d) | 2, 8, 11, 12          |
| 10       |                                |      |                             |                                  |                  |                    | 134.3 (s)               |                       |
| 11       | 1.67                           | s    |                             |                                  | 9                |                    | 25.7 (q)                | 9, 10, 12             |
| 12       | 1.59 <sup>d3</sup>             | s    |                             |                                  | 8A, 8B           |                    | 17.8 <sup>d4</sup> (q)  | 9, 10, 11             |
| 1'       |                                |      |                             |                                  |                  |                    | 174.3 (s)               |                       |
| 2'       | 3.28                           | m    |                             | 3', 8'A, 8'B                     | 5', 9'           |                    | 44.9 (d)                | 1', 3', 4', 8', 9'    |
| 3'       | 5.51                           | d    | 9.6 (2')                    | 2'                               | 7', 8'A, 8'B, 9' |                    | 127.2 (d)               | 1', 2', 5', 7', 8'    |
| 4'       |                                |      |                             |                                  |                  |                    | 138.7 (s)               |                       |
| 5'A      | 2.25                           | m    |                             | 5'B, 6'A, 6'B                    | 2'               |                    | 32.2 (t)                | 3', 4', 6', 7'        |
| 5'B      | 2.51                           | m    |                             | 5'A, 6'A, 6'B                    | 2'               |                    |                         | 3', 4', 6', 7'        |
| 6'A      | 3.65                           | br s |                             | 5'A, 5'B, 6'B                    |                  |                    | 61.1 (t)                |                       |
| 6'B      | 3.71                           | br s |                             | 5'A, 5'B, 6'A                    |                  |                    |                         |                       |
| 7'       | 4.02                           | m    |                             |                                  | 3'               |                    | 67.4 (t)                | 3', 4'                |
| 8'A      | 2.20                           | m    |                             | 2', 8'B, 9'                      | 12'              |                    | 31.4 (t)                | 1', 2', 3', 9', 10'   |
| 8'B      | 2.44                           | m    |                             | 2', 8'A, 9'                      | 12'              |                    |                         | 1', 2', 3', 9', 10'   |
| 9'       | 5.06 <sup>d1</sup>             | dd   | 7.2 (8'A), 7.2 (8'B)        | 8'A, 8'B                         | 2', 3', 11'      |                    | 120.3 <sup>d2</sup> (d) | 11', 12'              |
| 10'      |                                |      |                             |                                  |                  |                    | 134.3 (s)               |                       |
| 11'      | 1.67                           | s    |                             |                                  | 9'               |                    | 25.7 (q)                | 9', 10', 12'          |
| 12'      | 1.61 <sup>d3</sup>             | s    |                             |                                  | 8'A, 8'B         |                    | 17.9 <sup>d4</sup> (q)  | 9', 10', 11'          |

a  $^1\text{H}$  chemical shift values (d ppm from SiMe<sub>4</sub>) followed by multiplicity and then the coupling constants (J/Hz). Figures in parentheses indicate the proton coupling with that position. b The correlations with geminal and vicinal protons are removed. c Long range  $^1\text{H}$ - $^{13}\text{C}$  correlations from H to C observed in the HMBC experiment. d1-d4 interchangeable

Table S4 NMR spectral data of **4** in CDCl<sub>3</sub>

| Position   | $\delta_{\text{H}}^{\text{a}}$ | $J/\text{Hz}$                              | $^1\text{H}-^1\text{H}$ COSY | NOESY <sup>b</sup>  | $\delta_{\text{C}}$ | HMBC (C) <sup>c</sup> |
|------------|--------------------------------|--------------------------------------------|------------------------------|---------------------|---------------------|-----------------------|
| 1          | 3.68                           | m                                          | 2, 8A, 8B                    | 9                   | 40.2 (d)            |                       |
| 2          | 5.36                           | br s                                       | 1                            | 8A, 8B, 9, 13A, 13B | 121.2 (d)           | 4, 7, 8, 13           |
| 3          |                                |                                            |                              |                     | 139.2 (s)           |                       |
| 4A         | 2.45                           | br d 19.2 (5B)                             | 4B, 5                        | 13A                 | 30.3 (t)            |                       |
| 4B         | 2.59                           | m                                          | 5A, 5B, 6B                   | 13B                 |                     |                       |
| 5 $\alpha$ | 4.68                           | ddd 12.6 (4B), 12.6 (5 $\beta$ ), 1.8 (4A) | 4, 5 $\beta$                 |                     | 64.4 (t)            | 3, 4, 7               |
| 5 $\beta$  | 4.33                           | ddd 12.6 (5 $\alpha$ ), 4.8 (4B), 2.4 (4A) | 4, 5 $\alpha$                |                     |                     | 3, 4, 7               |
| 6          |                                |                                            |                              |                     |                     |                       |
| 7          |                                |                                            |                              |                     | 174.3 (s)           |                       |
| 8A         | 2.33                           | ddd 14.4 (8B), 6.6 (1), 6.6 (9)            | 1, 8B, 9                     | 2, 11               | 30.1 (t)            | 1, 2, 7, 9, 10        |
| 8B         | 2.52                           | ddd 14.4 (8A), 6.6 (1), 6.6 (9)            | 1, 8A, 9                     | 2, 11               |                     | 1, 2, 7, 9, 10        |
| 9          | 5.14                           | dd 6.6 (8A), 6.6 (8B)                      | 8A, 8B                       | 1, 2, 11            | 120.9 (d)           | 1, 8, 11, 12          |
| 10         |                                |                                            |                              |                     | 134.6 (s)           |                       |
| 11         | 1.72                           | s                                          |                              | 9                   | 25.8 (q)            | 9, 10, 12             |
| 12         | 1.67                           | s                                          |                              | 8A, 8B              | 18.0 (q)            | 9, 10, 12             |
| 13A        | 3.99                           | d 13.8 (13B)                               |                              | 2, 4                | 67.4 (t)            | 2, 3, 4               |
| 13B        | 4.01                           | d 13.8 (13A)                               |                              | 2, 4                |                     |                       |

a  $^1\text{H}$  chemical shift values ( $\delta$  ppm from SiMe<sub>4</sub>) followed by multiplicity and then the coupling constants ( $J/\text{Hz}$ ). Figures in parentheses indicate the proton coupling with that position. b The correlations with geminal and vicinal protons are removed. c Long range  $^1\text{H}-^{13}\text{C}$  correlations from H to C observed in the HMBC experiment.

Figure S1  $^1\text{H}$  NMR spectrum of 1

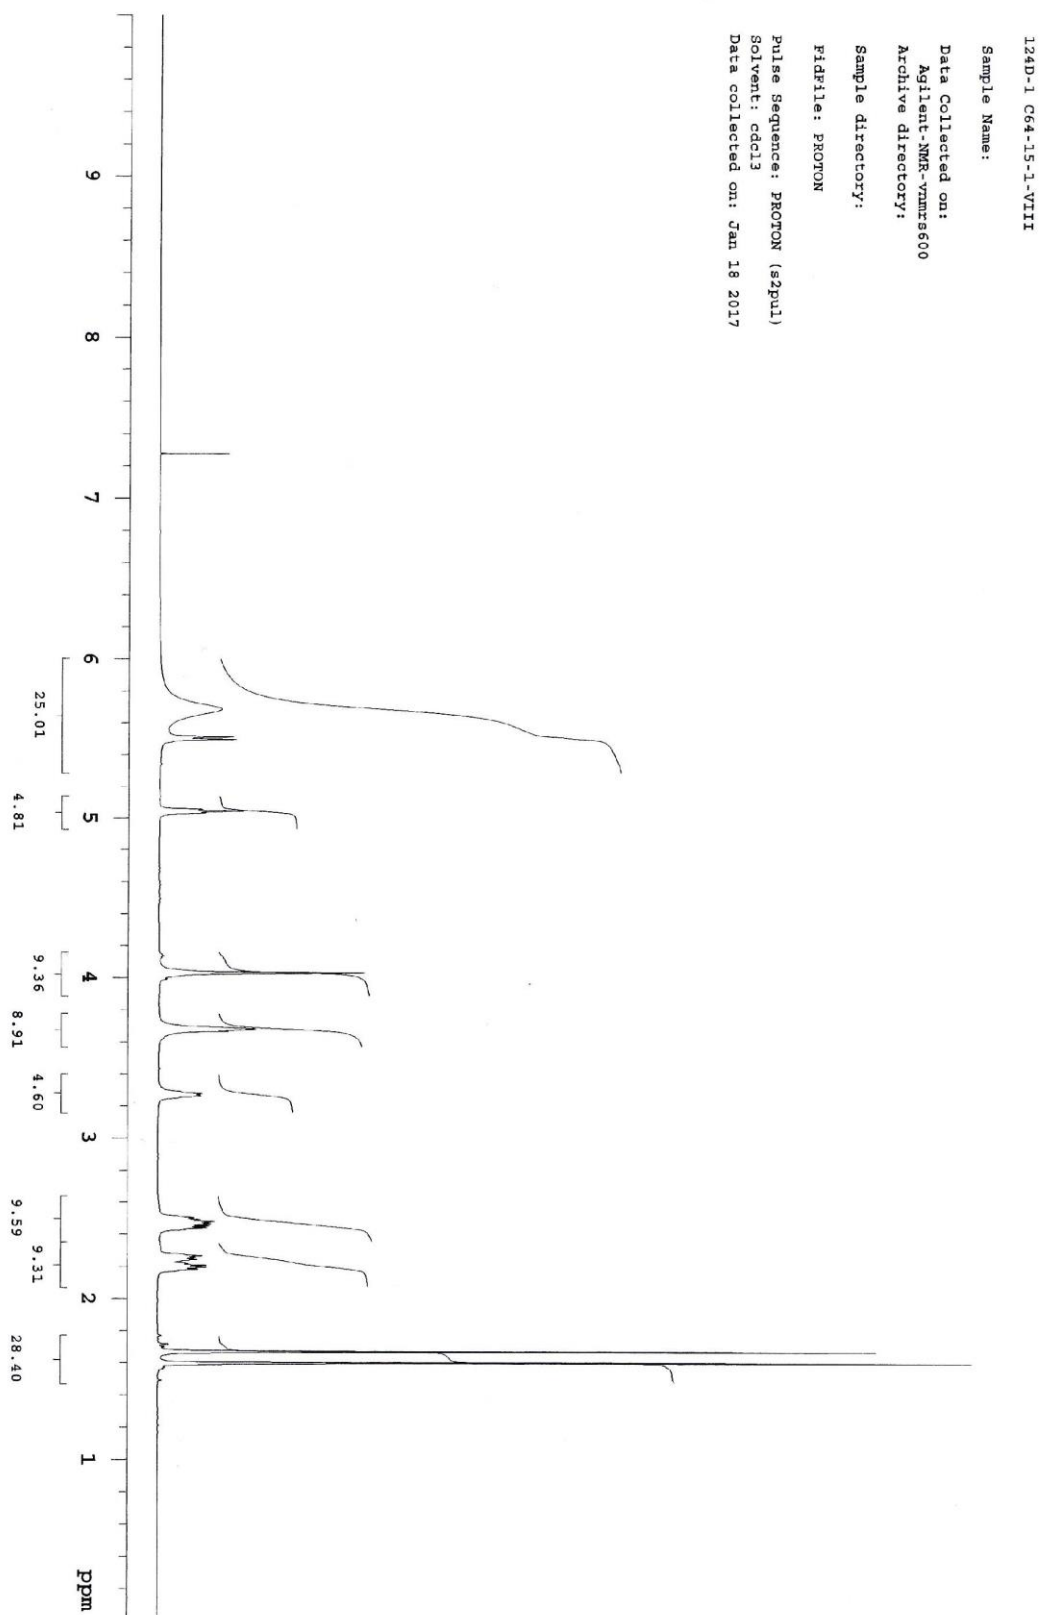

Figure S2  $^{13}\text{C}$  NMR spectrum of 1 in  $\text{CDCl}_3$

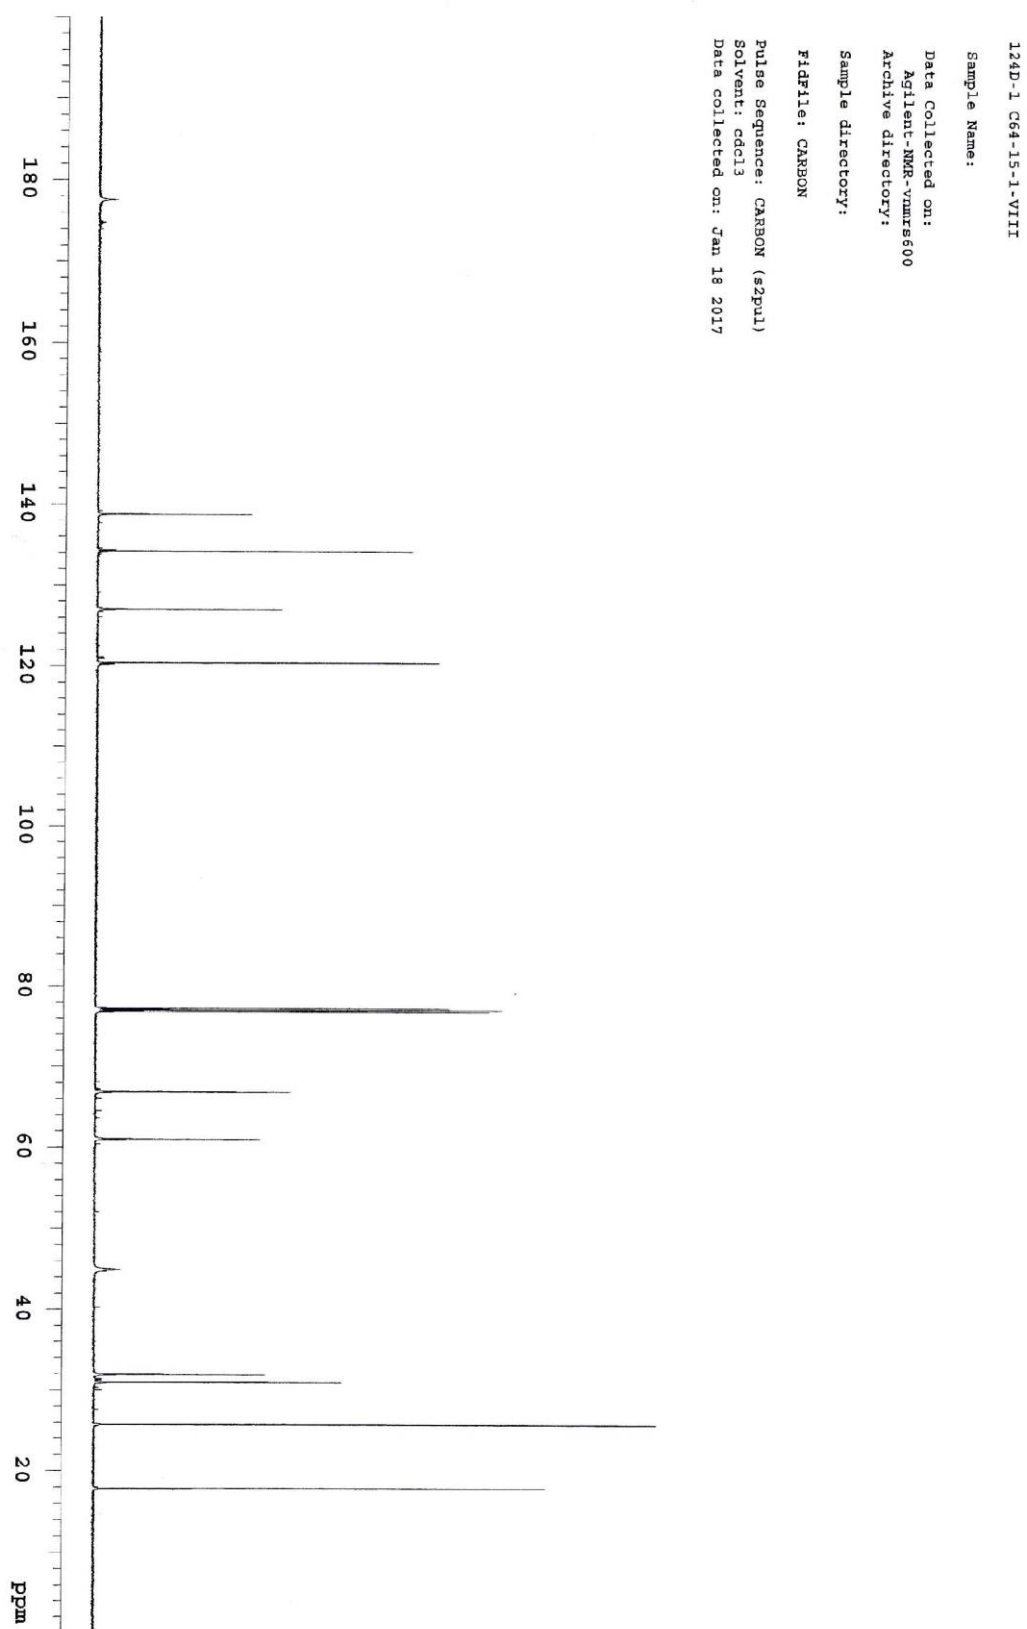



Figure S3  $^1\text{H}$ - $^1\text{H}$  COSY of 1

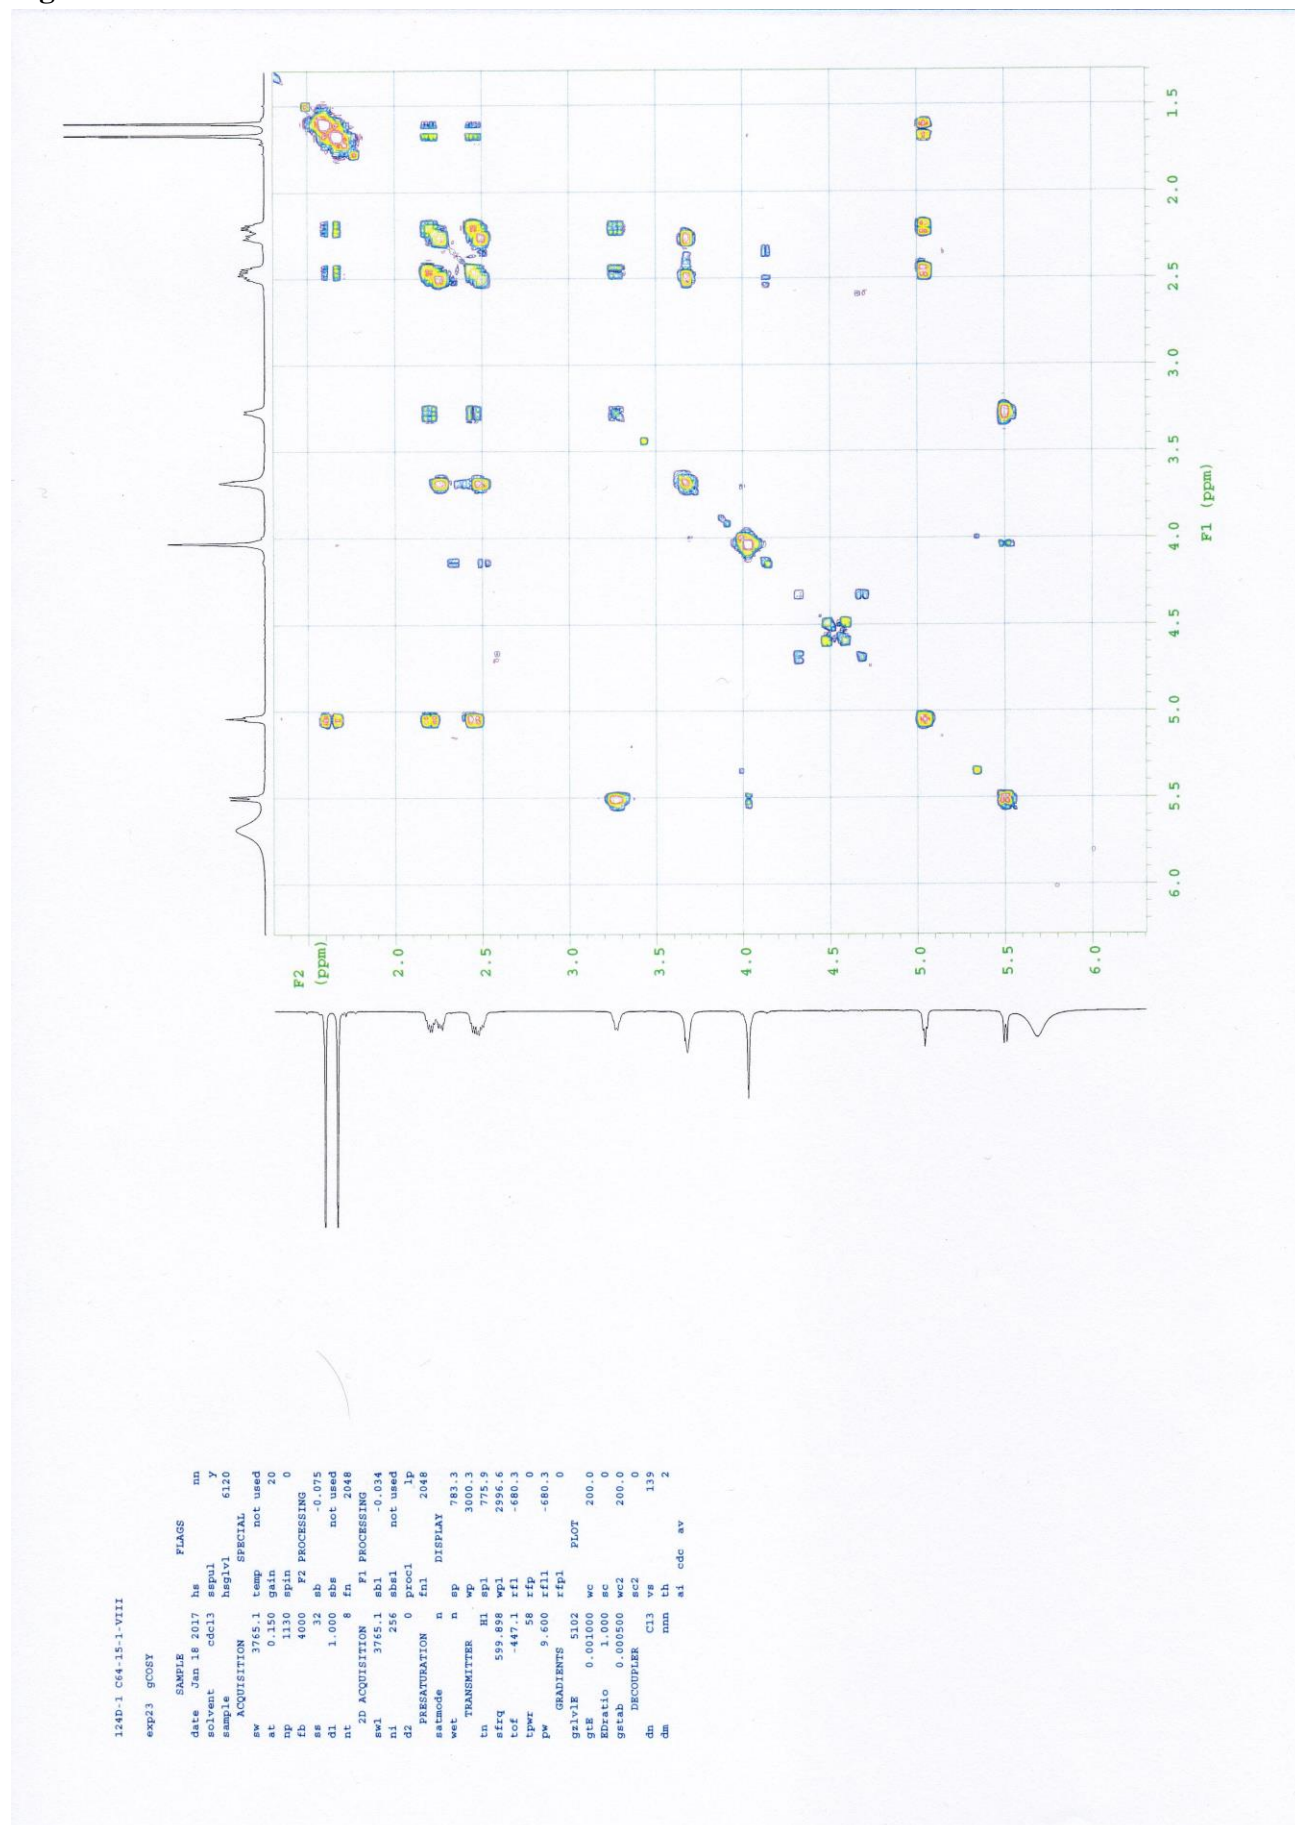

Figure S4 NOESY of 1

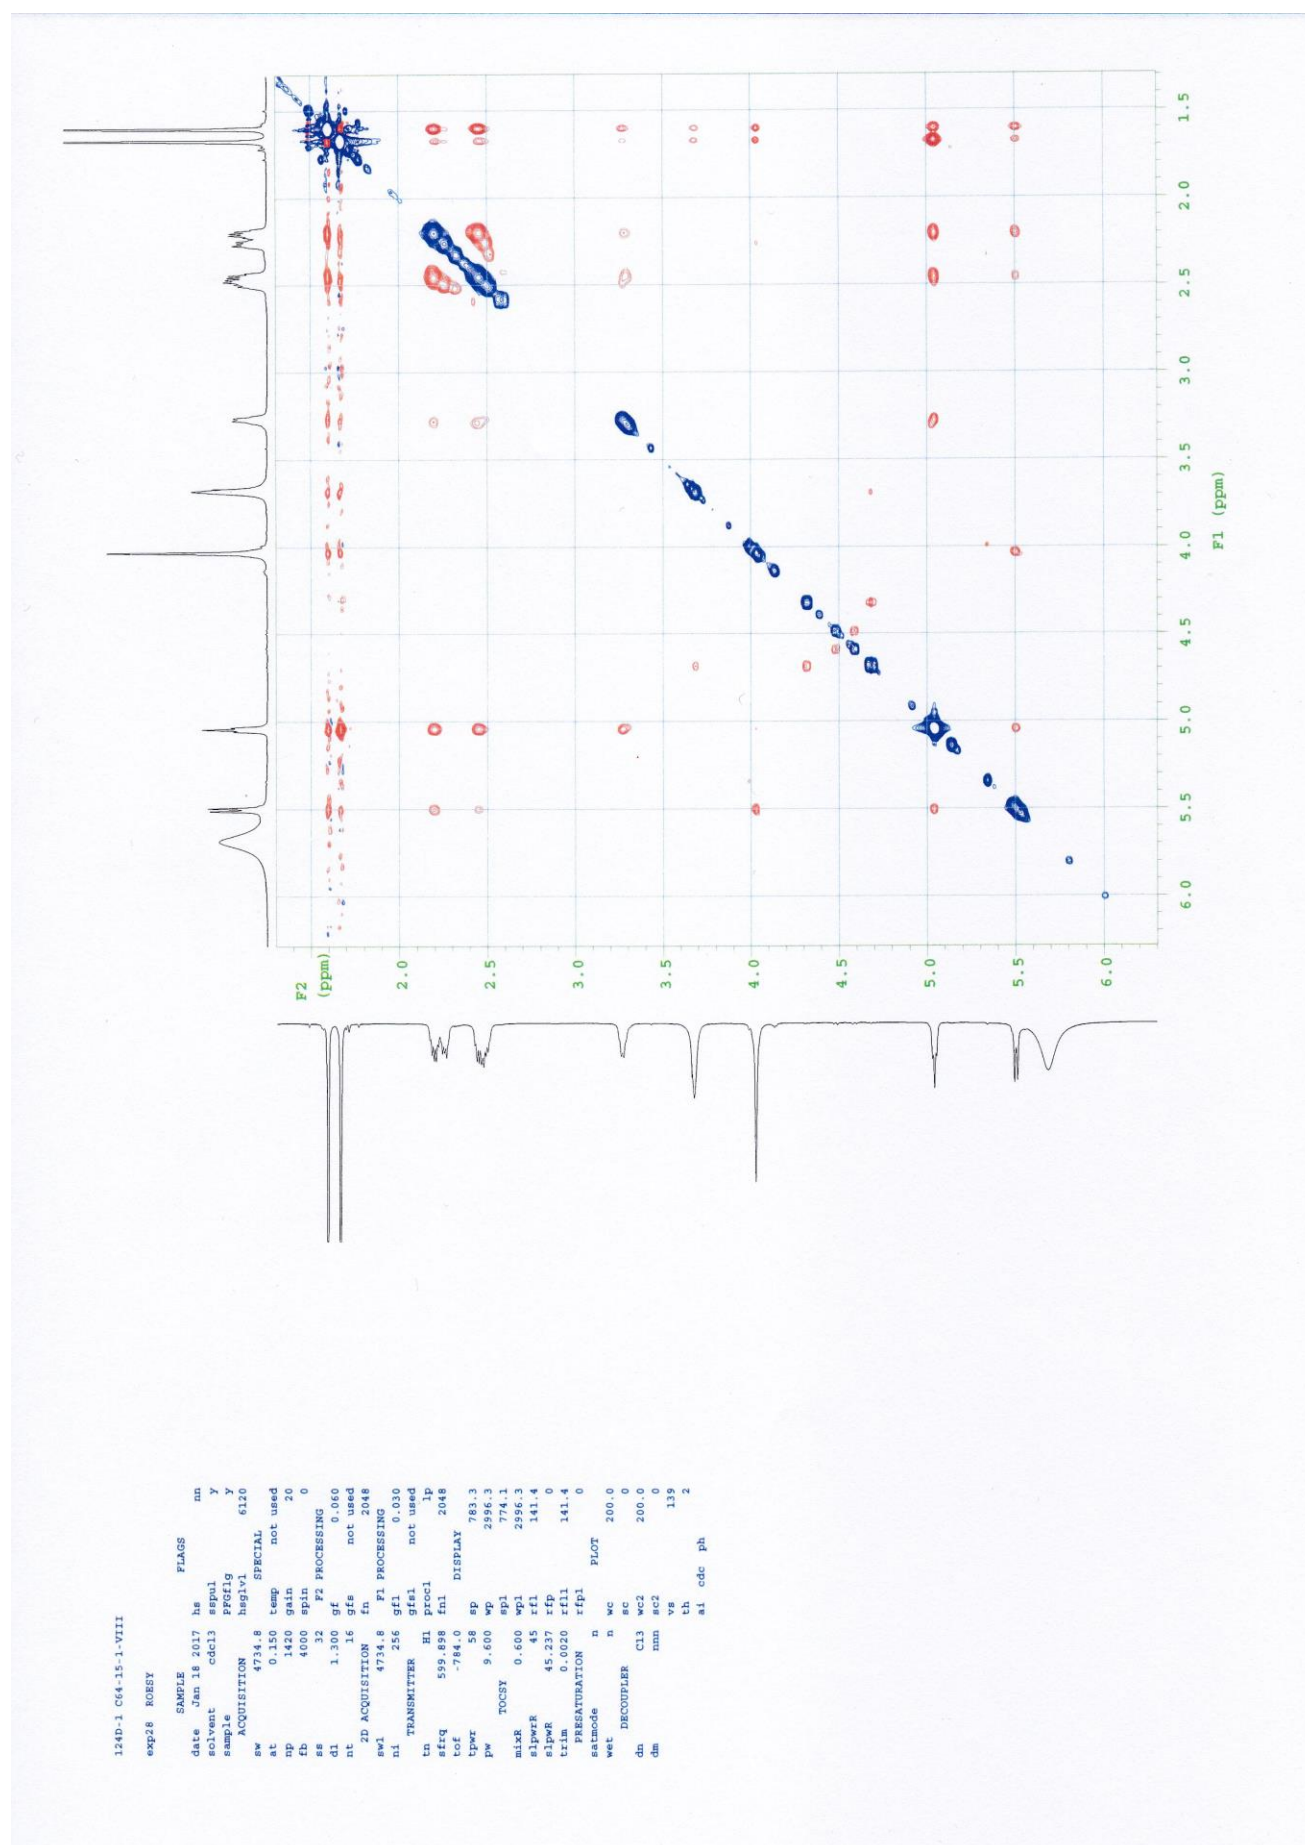

Figure S5 HMQC of 1

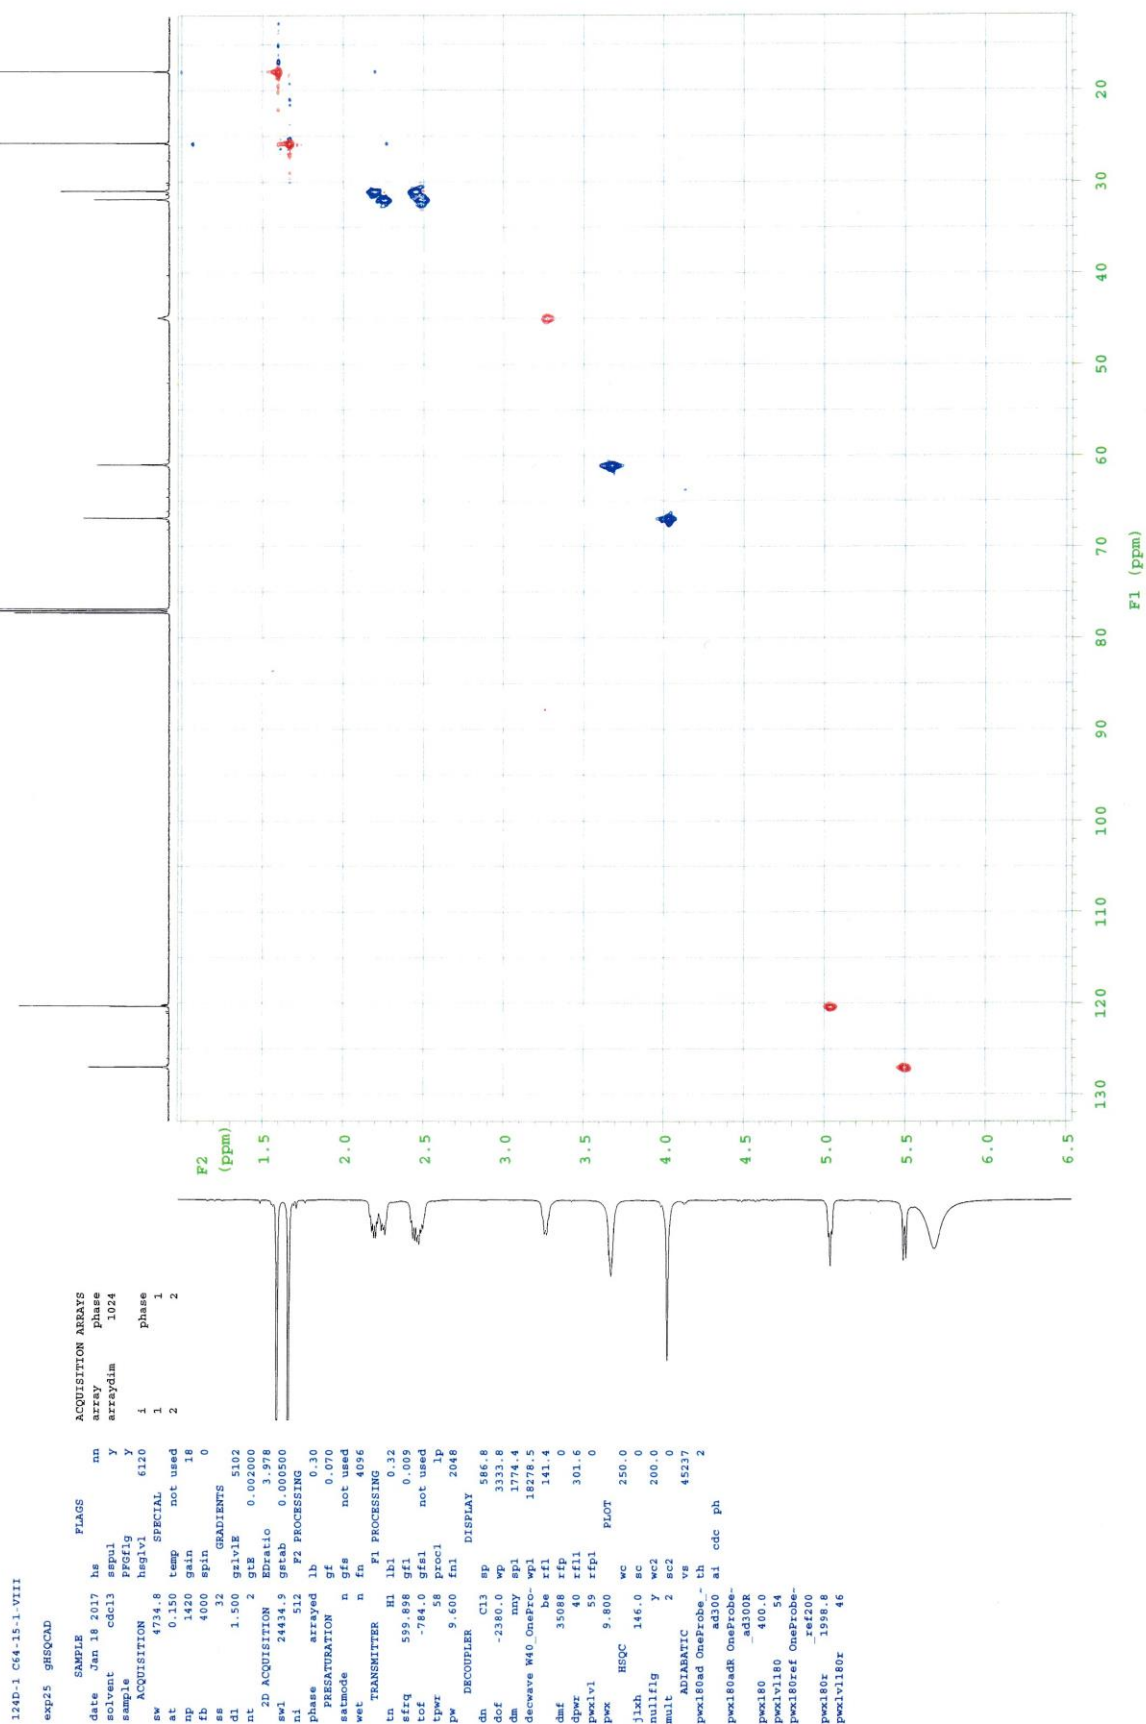



124D-1 C64-15-1-VIII

exp26 gsmcad

| SAMPLE         |             | FLAGS         |          | ACQUISITION ARRAYS |       |
|----------------|-------------|---------------|----------|--------------------|-------|
| date           | Jan 23 2017 | hs            | nn       | array              | phase |
| solvent        | cdcl3       | sspul         | y        | arraydim           | 1024  |
| sample         | PFGLig      |               |          |                    |       |
| acq            | 4629.6      | hsglvt        | 6120     | 1                  | 1     |
| sw             | 0.150       | temp          | not used | 2                  | 2     |
| at             | 1388        | gain          | 18       |                    |       |
| rp             | 4000        | spin          | 0        |                    |       |
| z              | 32          | GRADIENTS     | 510      |                    |       |
| d1             | 1.500       | gr1vt1        | 510      |                    |       |
| nt             | 32          | gr1           | 0.001000 |                    |       |
| 2D ACQUISITION | gr1vt13     | 1530          |          |                    |       |
| sw1            | 30627.9     | gr13          | 0.001000 |                    |       |
| n1             | 512         | gr1ab         | 0.000500 |                    |       |
| Phase          | arrayed     | P2 PROCESSING |          |                    |       |
| PRESATURATION  | sb          | -0.075        |          |                    |       |
| satmode        | n           | abs           | not used |                    |       |
| wet            | n           | fn            | 4096     |                    |       |
| TRANSMITTER    |             |               |          |                    |       |
| tn             | R1          | gr1           | 0.005    |                    |       |
| sfrq           | 595.898     | gr1           | not used |                    |       |
| tof            | -777.2      | procl         | lp       |                    |       |
| tpwr           | 58          | fn1           | 2048     |                    |       |
| PW             | 9.600       | DISPLAY       |          |                    |       |
| dn             | DECOUPLER   | sp            | 462.8    |                    |       |
| dn             | C13         | wp            | 3334.3   |                    |       |
| dof            | 561.5       | sp1           | 1308.1   |                    |       |
| dm             | nm          | wp1           | 25991.8  |                    |       |
| decwave        | W40         | OneProc       | zfl      | 82.0               |       |
| dms            | 35088       | zfl1          | 456.5    |                    |       |
| dpr            | 40          | zfl2          | 0        |                    |       |
| poztvl         | 59          | PLOT          |          |                    |       |
| poz            | 9.800       | wc            | 250.0    |                    |       |
| flsh           | 146.0       | sc            | 0        |                    |       |
| jinh           | 8.0         | sc2           | 200.0    |                    |       |
| ADIRATCIC      | vs          |               | 11429    |                    |       |
| psw1load       | OneProbe    | -th           |          |                    |       |
| psw1v180       | ad300       | ai            | cdc      | av                 |       |
| psw160         | 400.0       |               |          |                    |       |

Figure S7  $^1\text{H}$  NMR spectrum of **2** in  $\text{CDCl}_3$

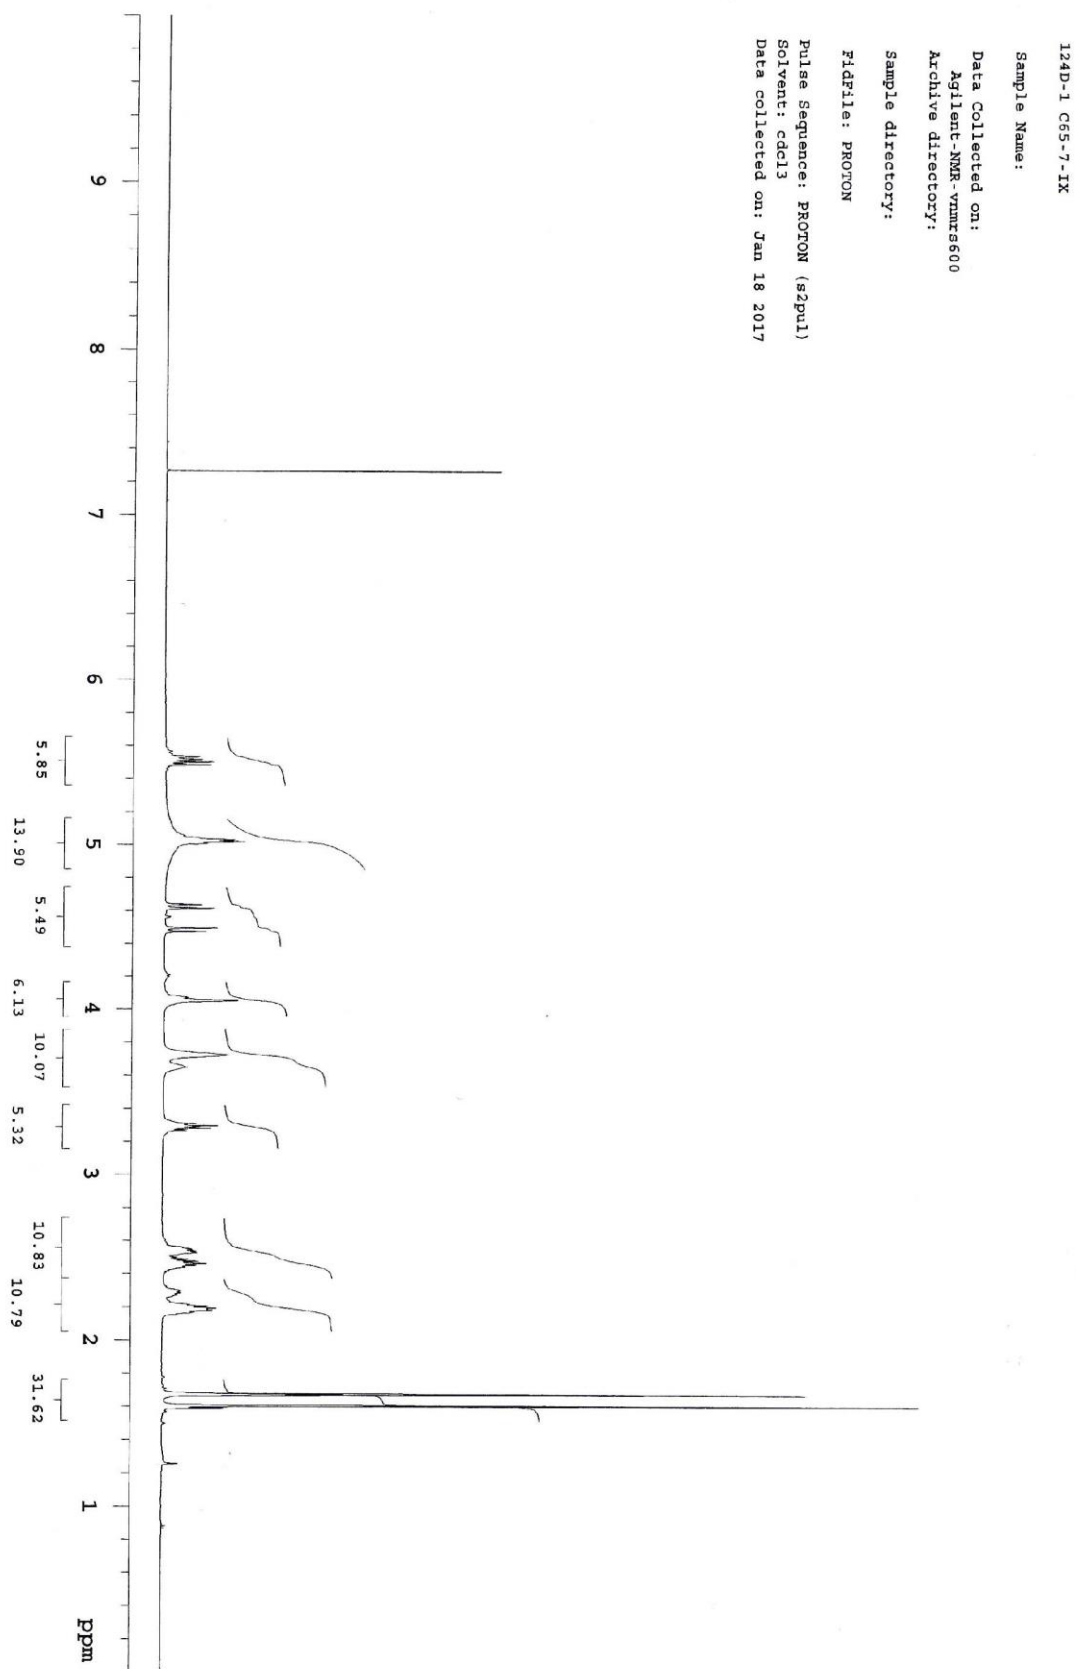

Figure S8  $^{13}\text{C}$  NMR spectrum of 2 in  $\text{CDCl}_3$

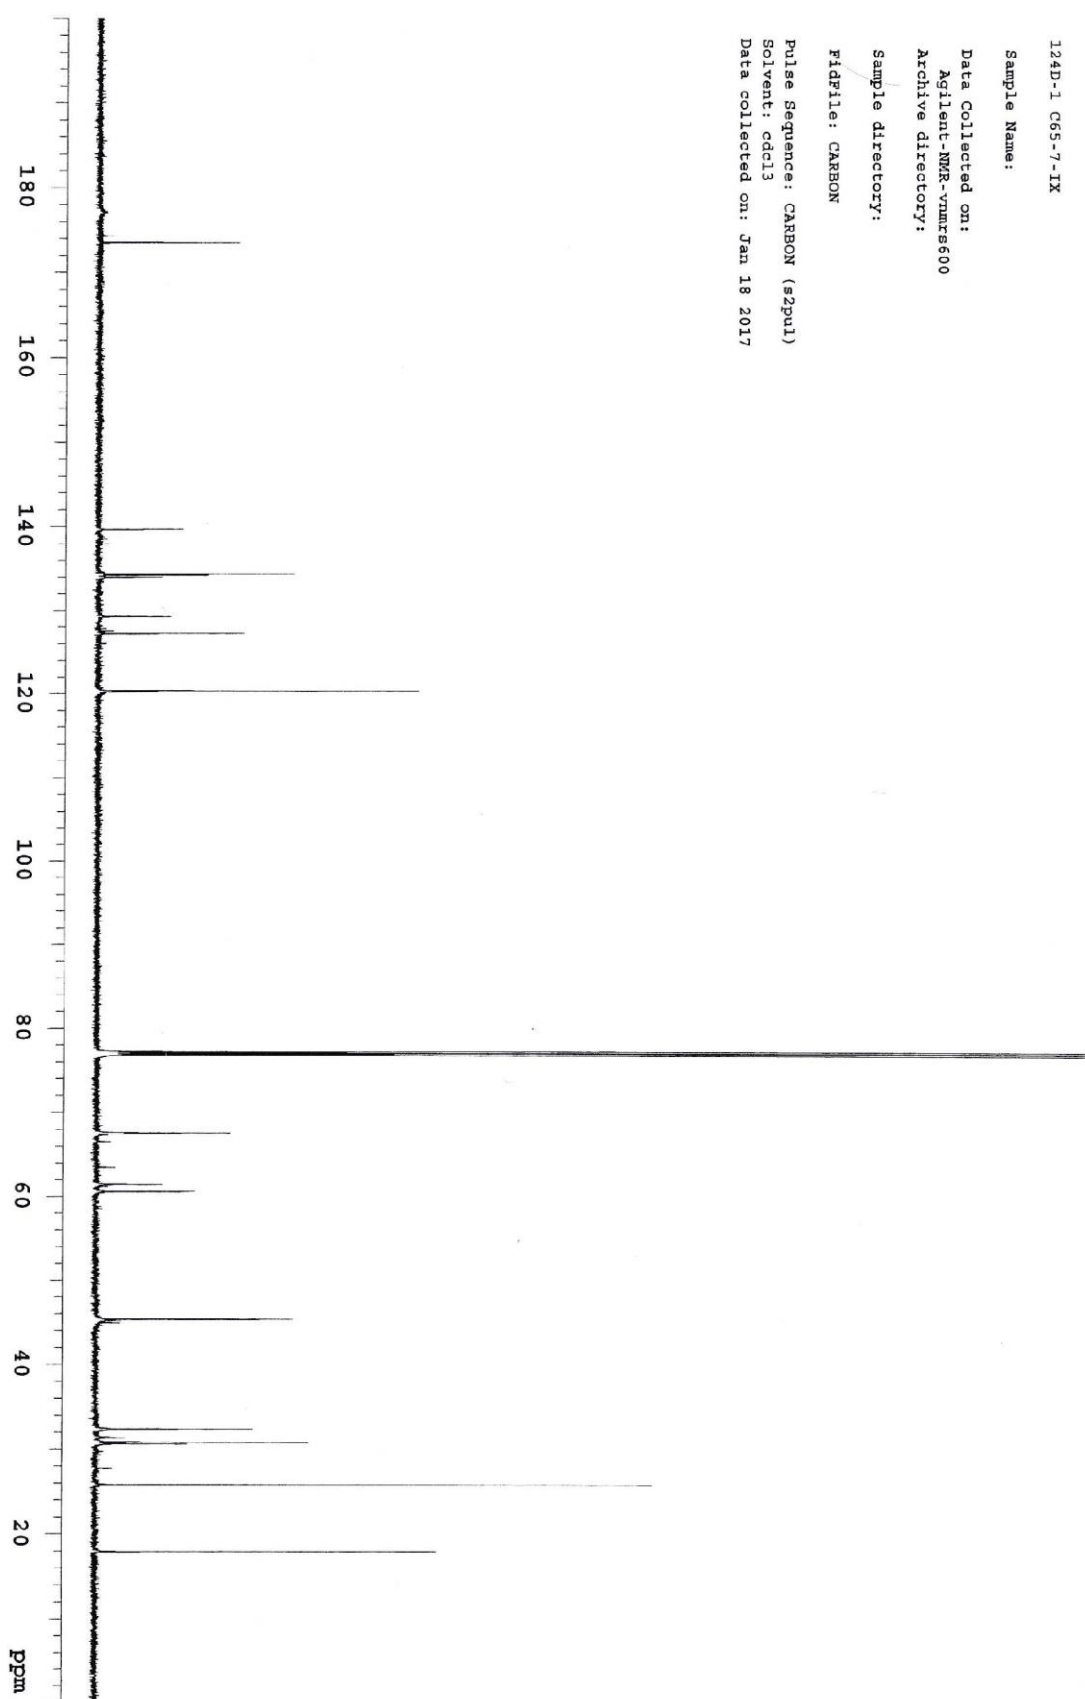

Figure S9  $^1\text{H}$ - $^1\text{H}$  COSY of 2

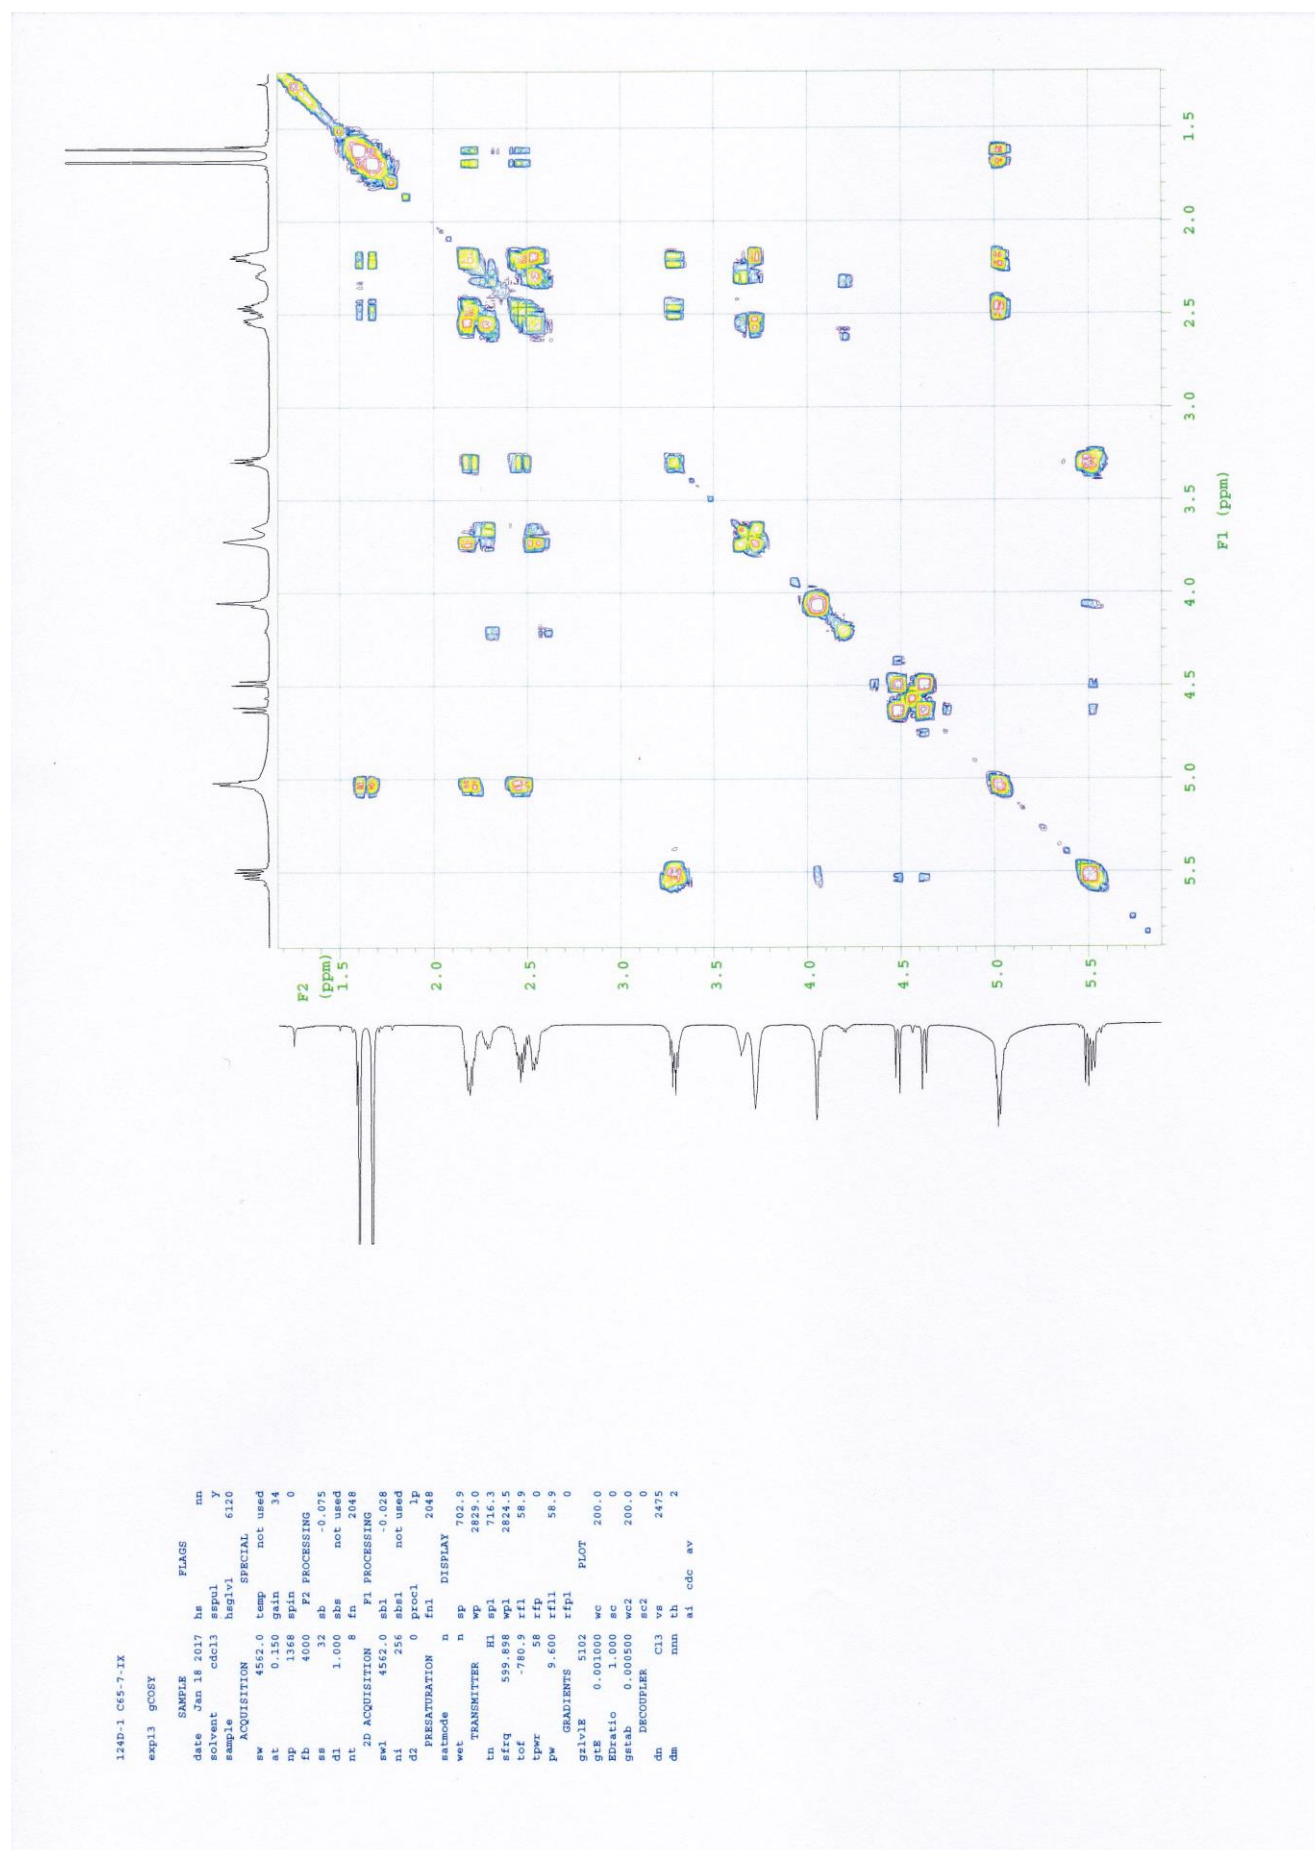



Figure S10 NOESY of 2

```

124D-1 C65-7-IX
exp14 NOESY

SAMPLE          FLAGS
date   Jan 18 2017   hs
solvent cdc13        spul
sample  Y             Y
sw ACQUISITION    beg1v1 6120
at 0.150 temp      not used
np 1388 gain
fb 4000 spin
ss 32             F2 PROCESSING
d1 1.300 gf        0.060
nt 16             not used
2D ACQUISITION    fn 2048
sw1 4629.6        F1 PROCESSING
ni 256            0.030
tn TRANSMITTER    H1 procl lp
sfreq 599.898     fnl 2048
tpr -788.3        DISPLAY
pw 9.600          sp 784.7
TOCSY 0.600       wp1 2830.2
mixr 45           rfl 718.3
slpwR 45.237      rfp 2825.7
trim 0.0020       rfil 100.1
PRGSATURATION     rfp1 100.1
satmode           n      PLOT
wet              n      wc 200.0
DECOUPLER        C13    sc 0
dm              C13    wc2 200.0
nn             mm      sc2 0
th             vs      2475
ai             cdc      ph 2
  
```

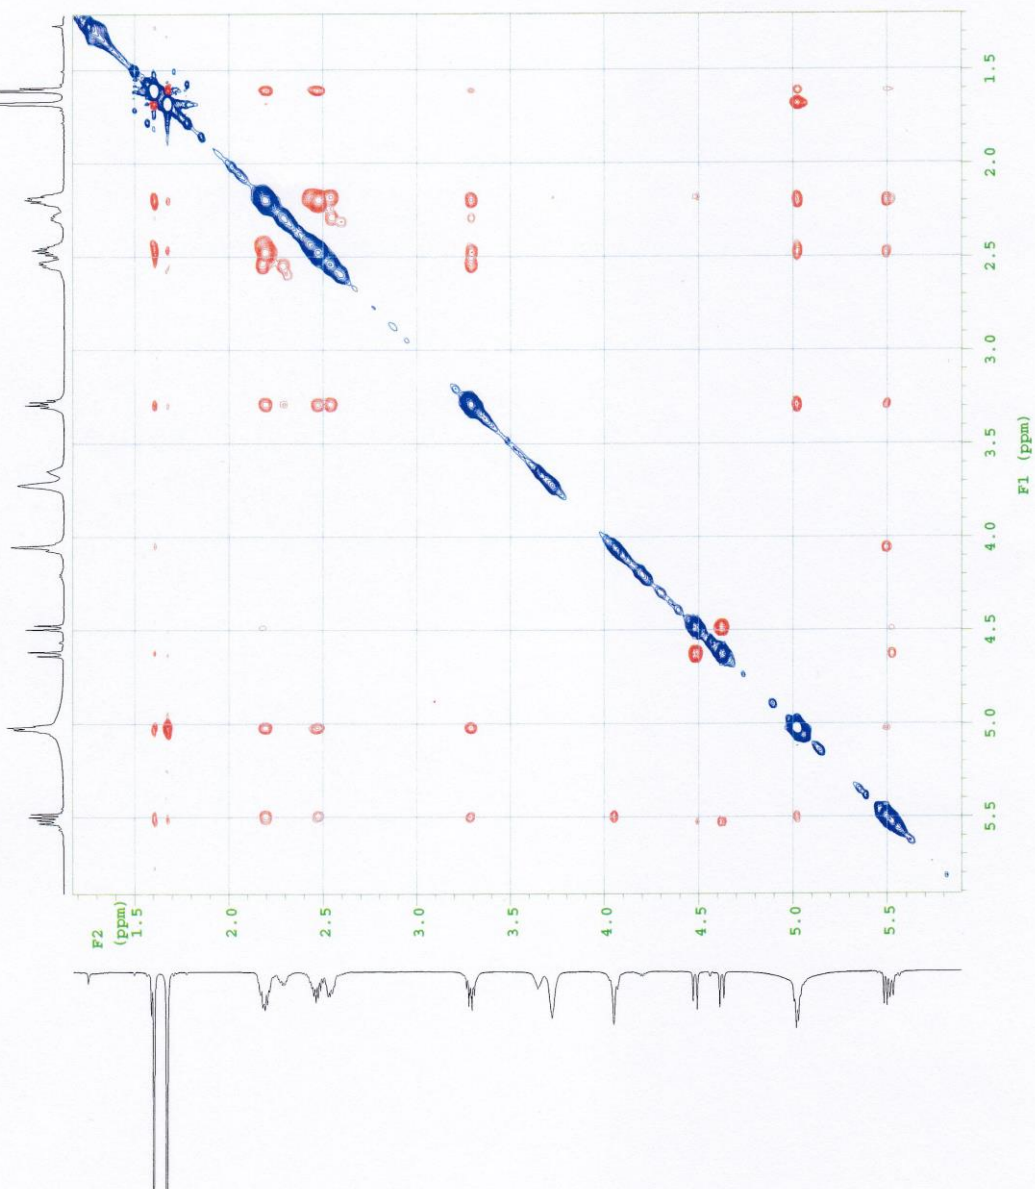



Figure S11 HMQC of 2

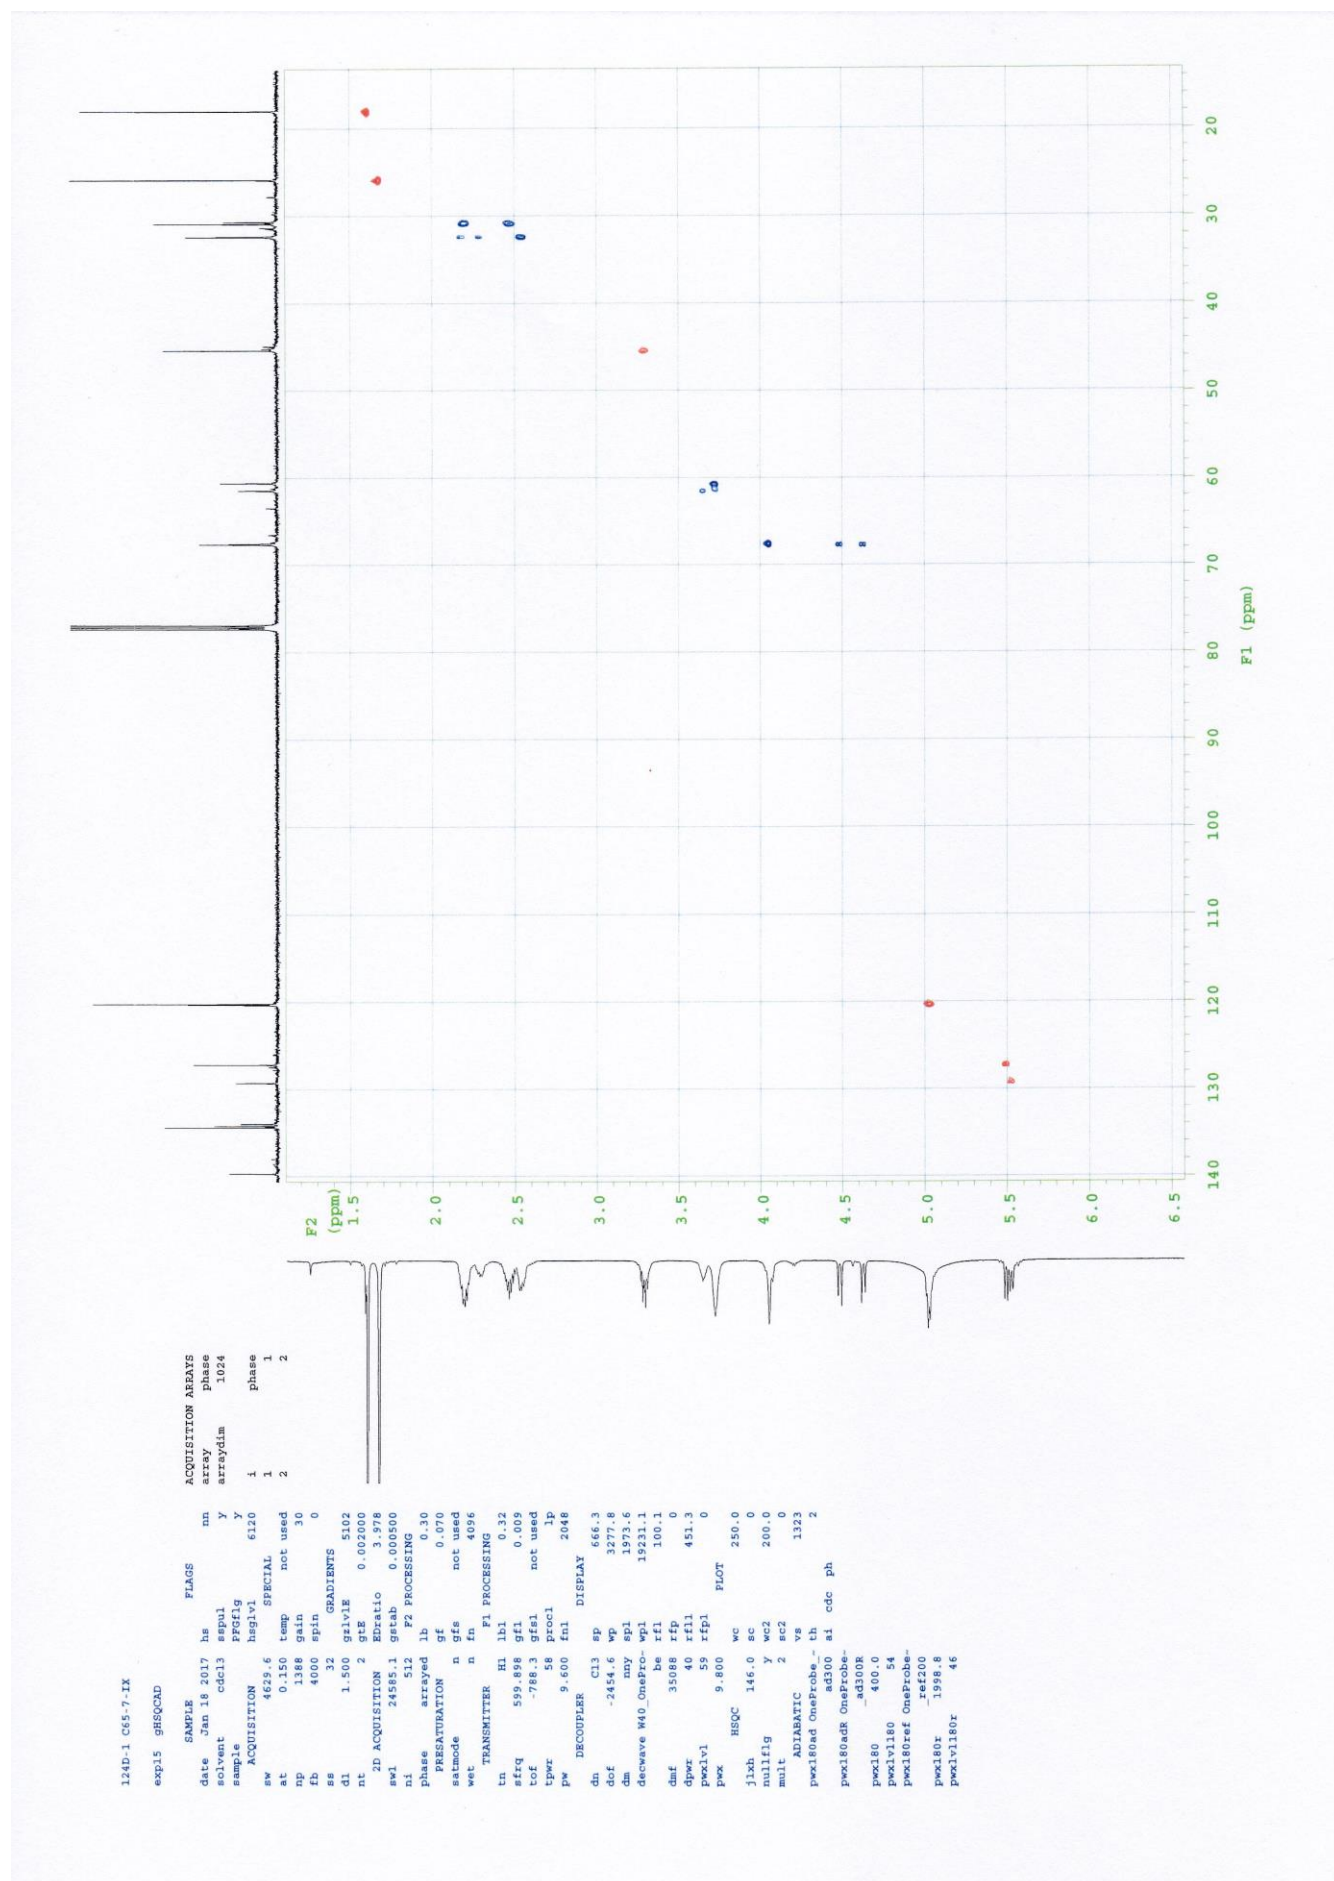

Figure S12 HMBC of 2

124D-1 C65-7-IX

exp16 ghmecad

SAMPLE date Jan 18 2017 ha nm  
 solvent cdcl3 spul y  
 sample arraydim 1024  
 ACQUISITION hsgivl 6120  
 sw 4625.6 SPECIAL 1  
 at 0.150 temp not used 2  
 ap 1388 gain 30  
 rd 4000 spin 0  
 ss 32 GRADIENTS  
 si 1.532 g1v11 51.0  
 nt 2D ACQUISITION g1v13 0.001000  
 sw1 30921.9 g1v13 1310  
 si 512 g1v13 0.001000  
 si 512 g1v13 0.000500  
 Phase arrayed F2 PROCESSING  
 PRESATURATION -0.075  
 satmode n ths not used  
 wet n fn not used  
 TRANSMITTER F1 PROCESSING  
 tn H1 gfl 0.005  
 sflq 599.898 gfl not used  
 tof -788.3 procl lp  
 tpwr 58 fnl 2048  
 pw 9.600 DISPLAY  
 DECOUPLER SP 754.4  
 dn C13 wp 2868.7  
 dof 411.4 wp1 1355.3  
 dm nnn wp1 25910.8  
 decwave W40 OnePro- rfl 100.1  
 be rfp 0  
 dmf 35088 rfl1 754.6  
 dpwr 40 rfp1 0  
 pwx1v1 59 PLOT  
 pwx 9.800 wc 250.0  
 j1zh HMC sc 0  
 j1zh 145.0 wc2 200.0  
 j1zh 8.0 ac2 0  
 ADIABATIC va 952  
 pwx180ad OneProbe\_ th  
 ad300 a1 cdc av 2  
 pwx1v1180 54  
 pwx180 400.0

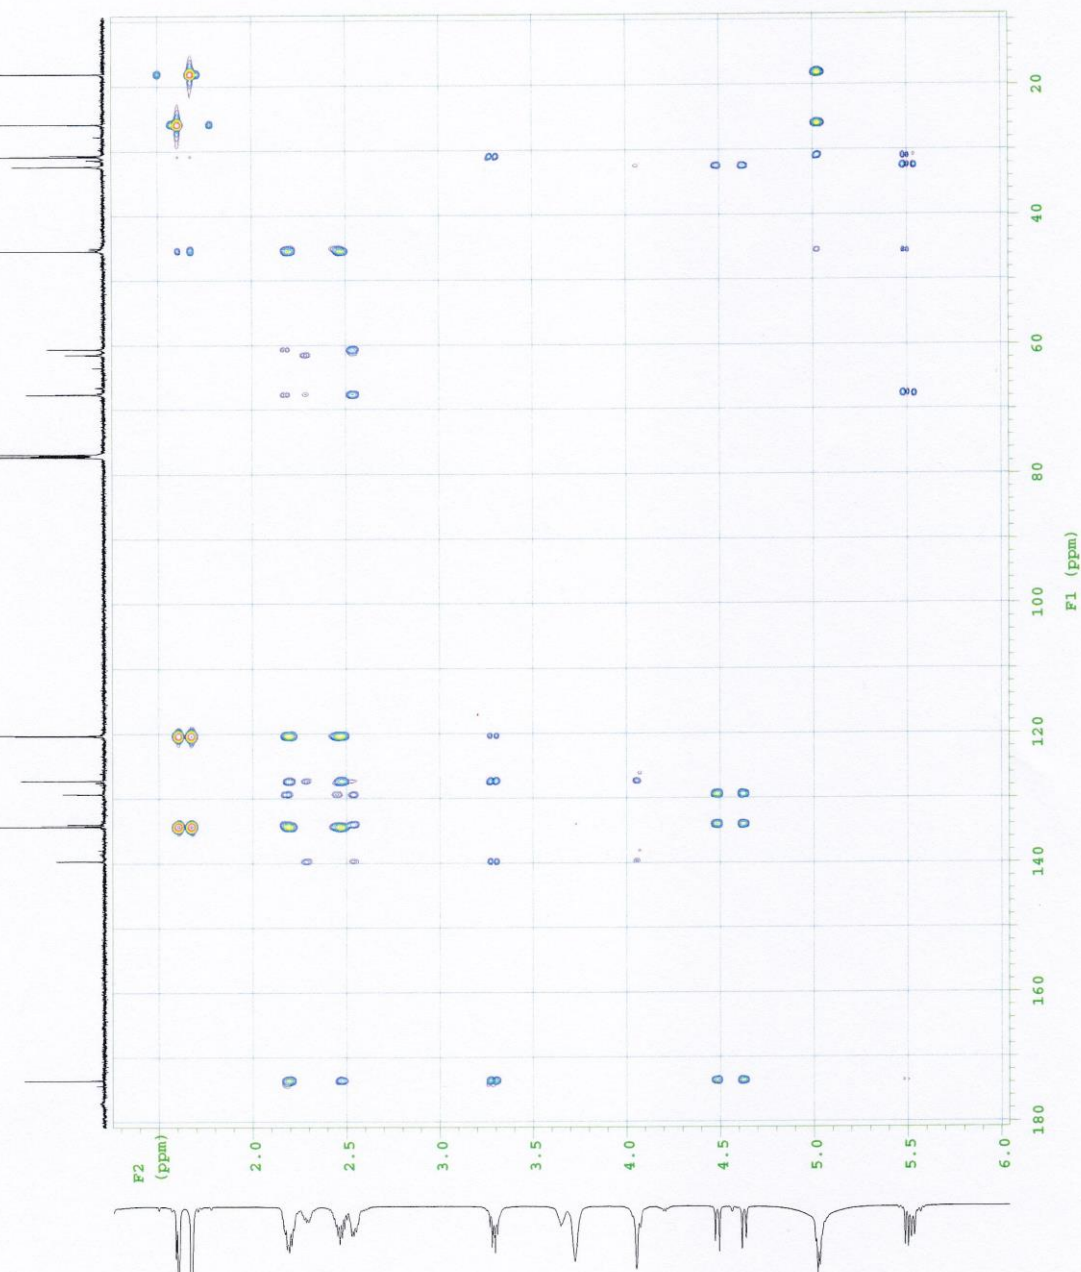

Figure S13  $^1\text{H}$  NMR spectrum of 3 in  $\text{CDCl}_3$

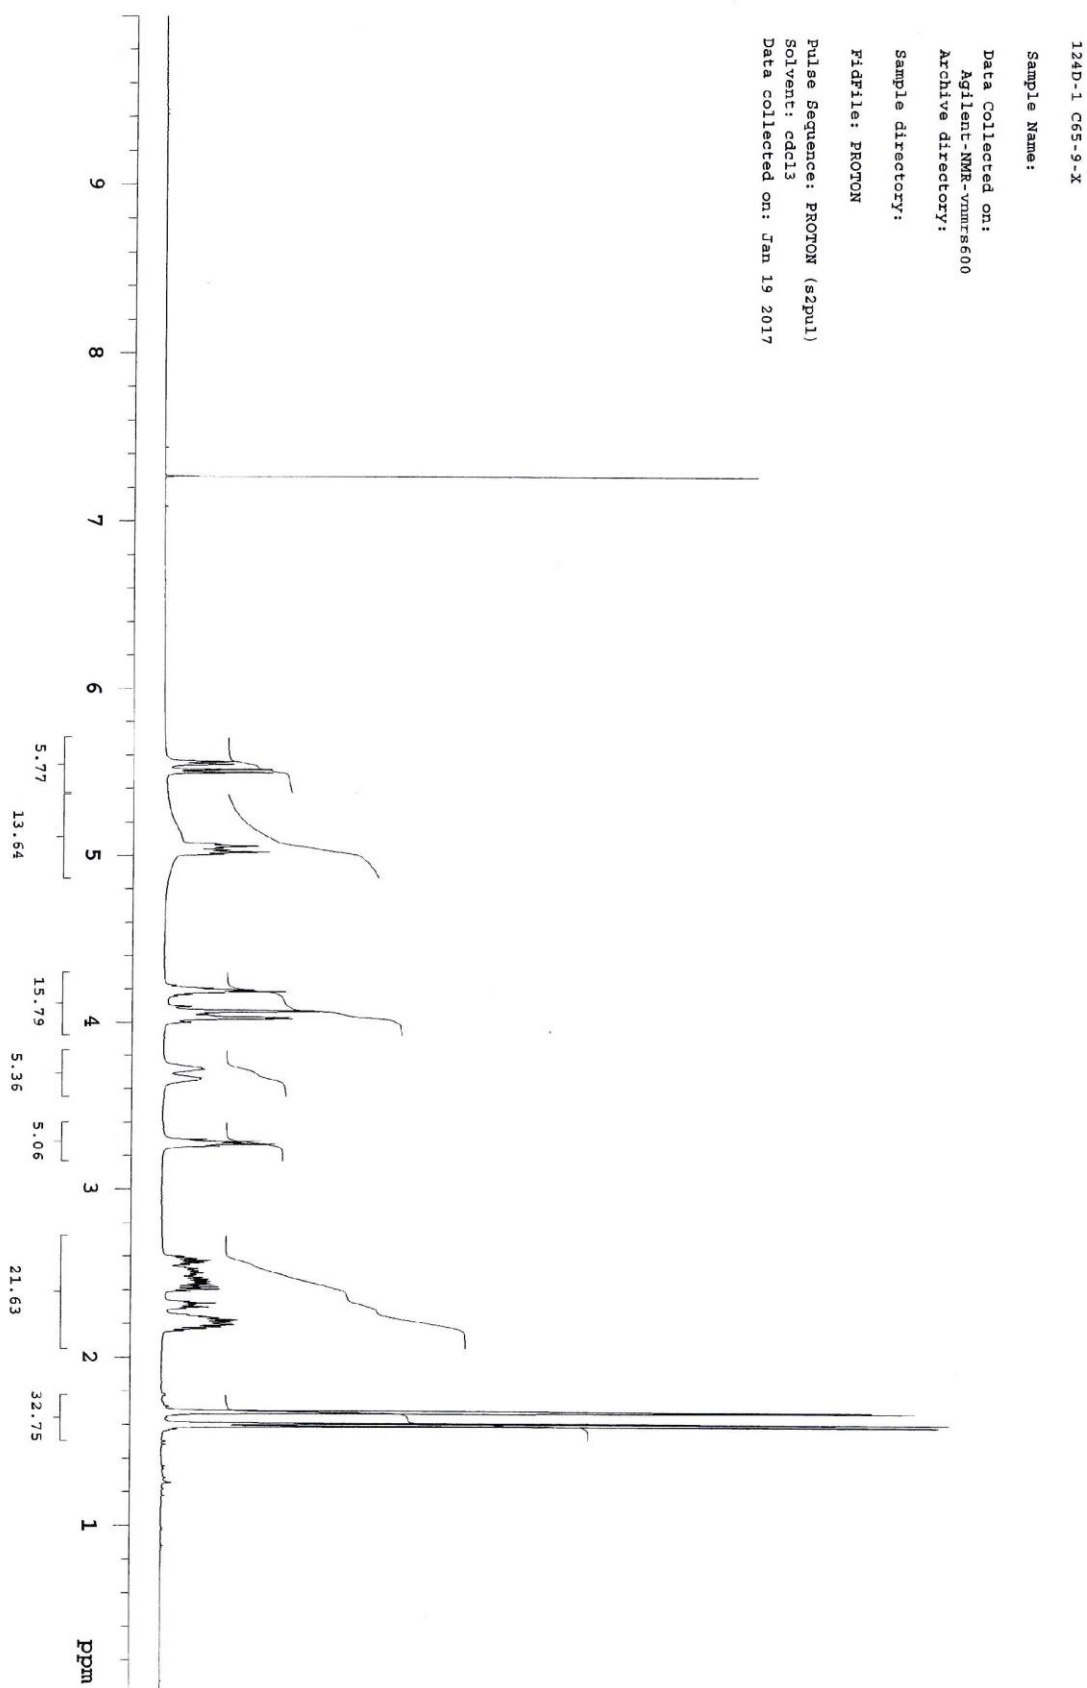

Figure S14  $^{13}\text{C}$  NMR spectrum of 3 in  $\text{CDCl}_3$

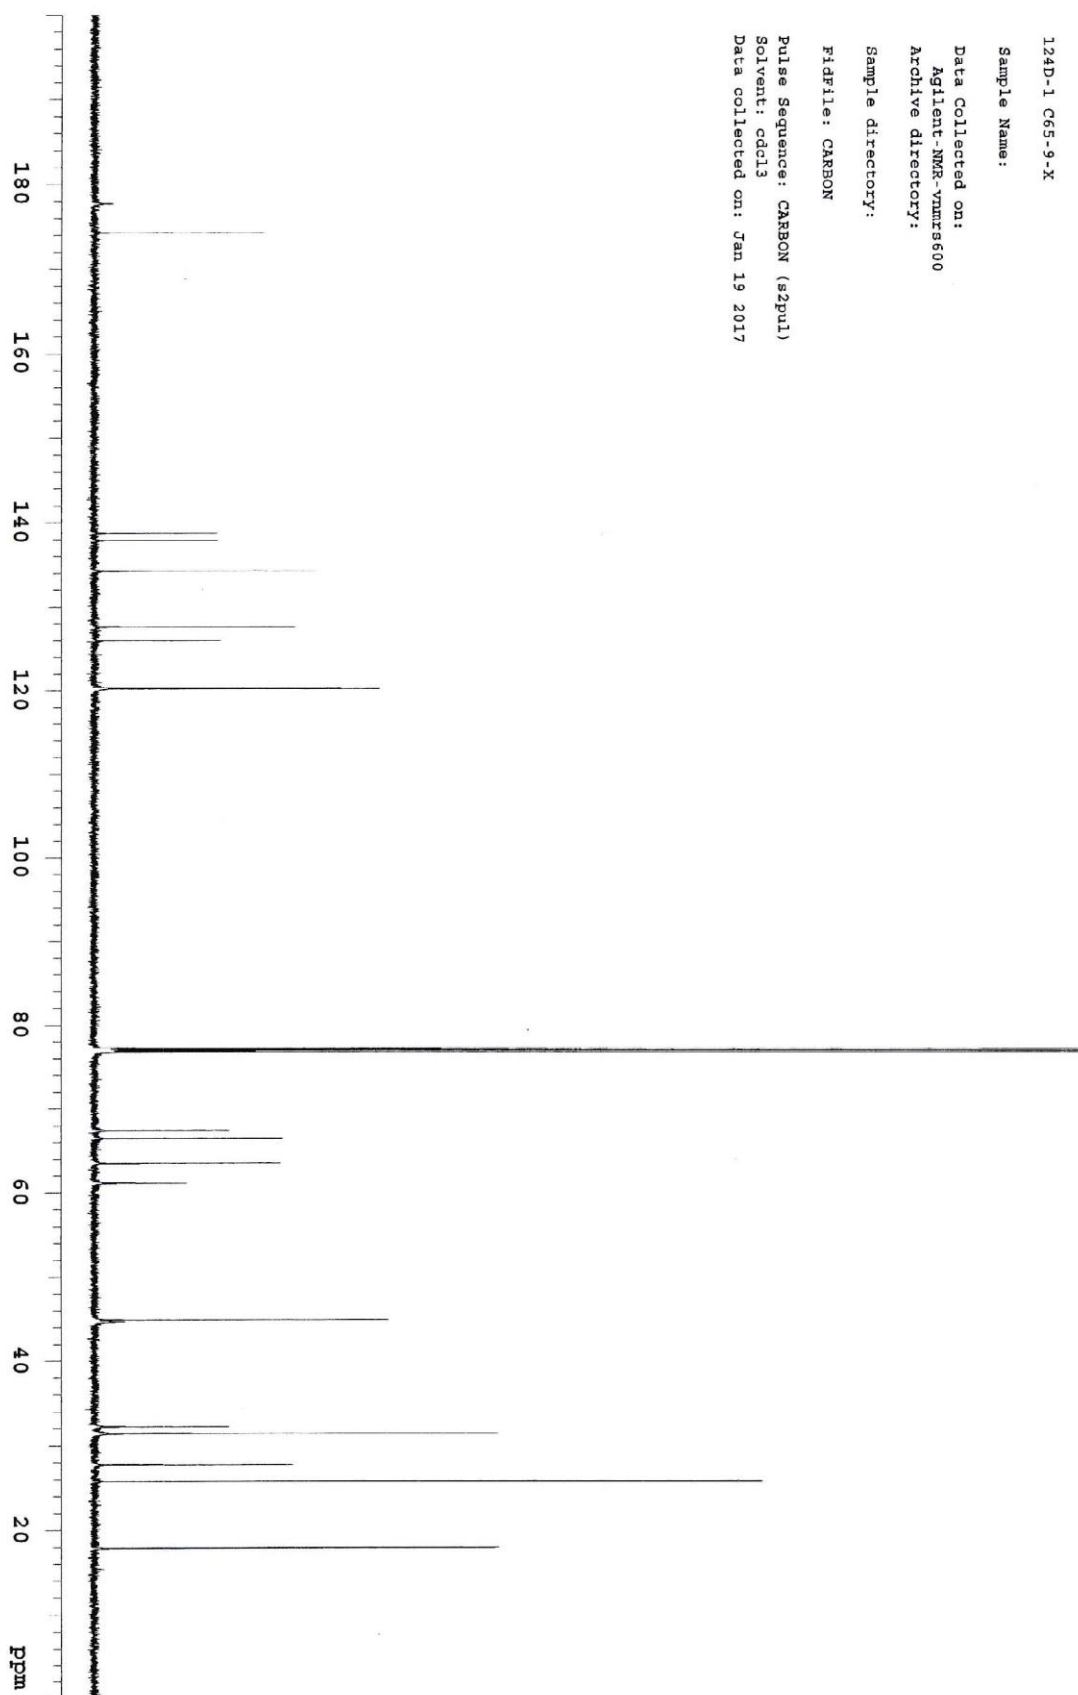



Figure S15  $^1\text{H}$ - $^1\text{H}$  COSY of 3

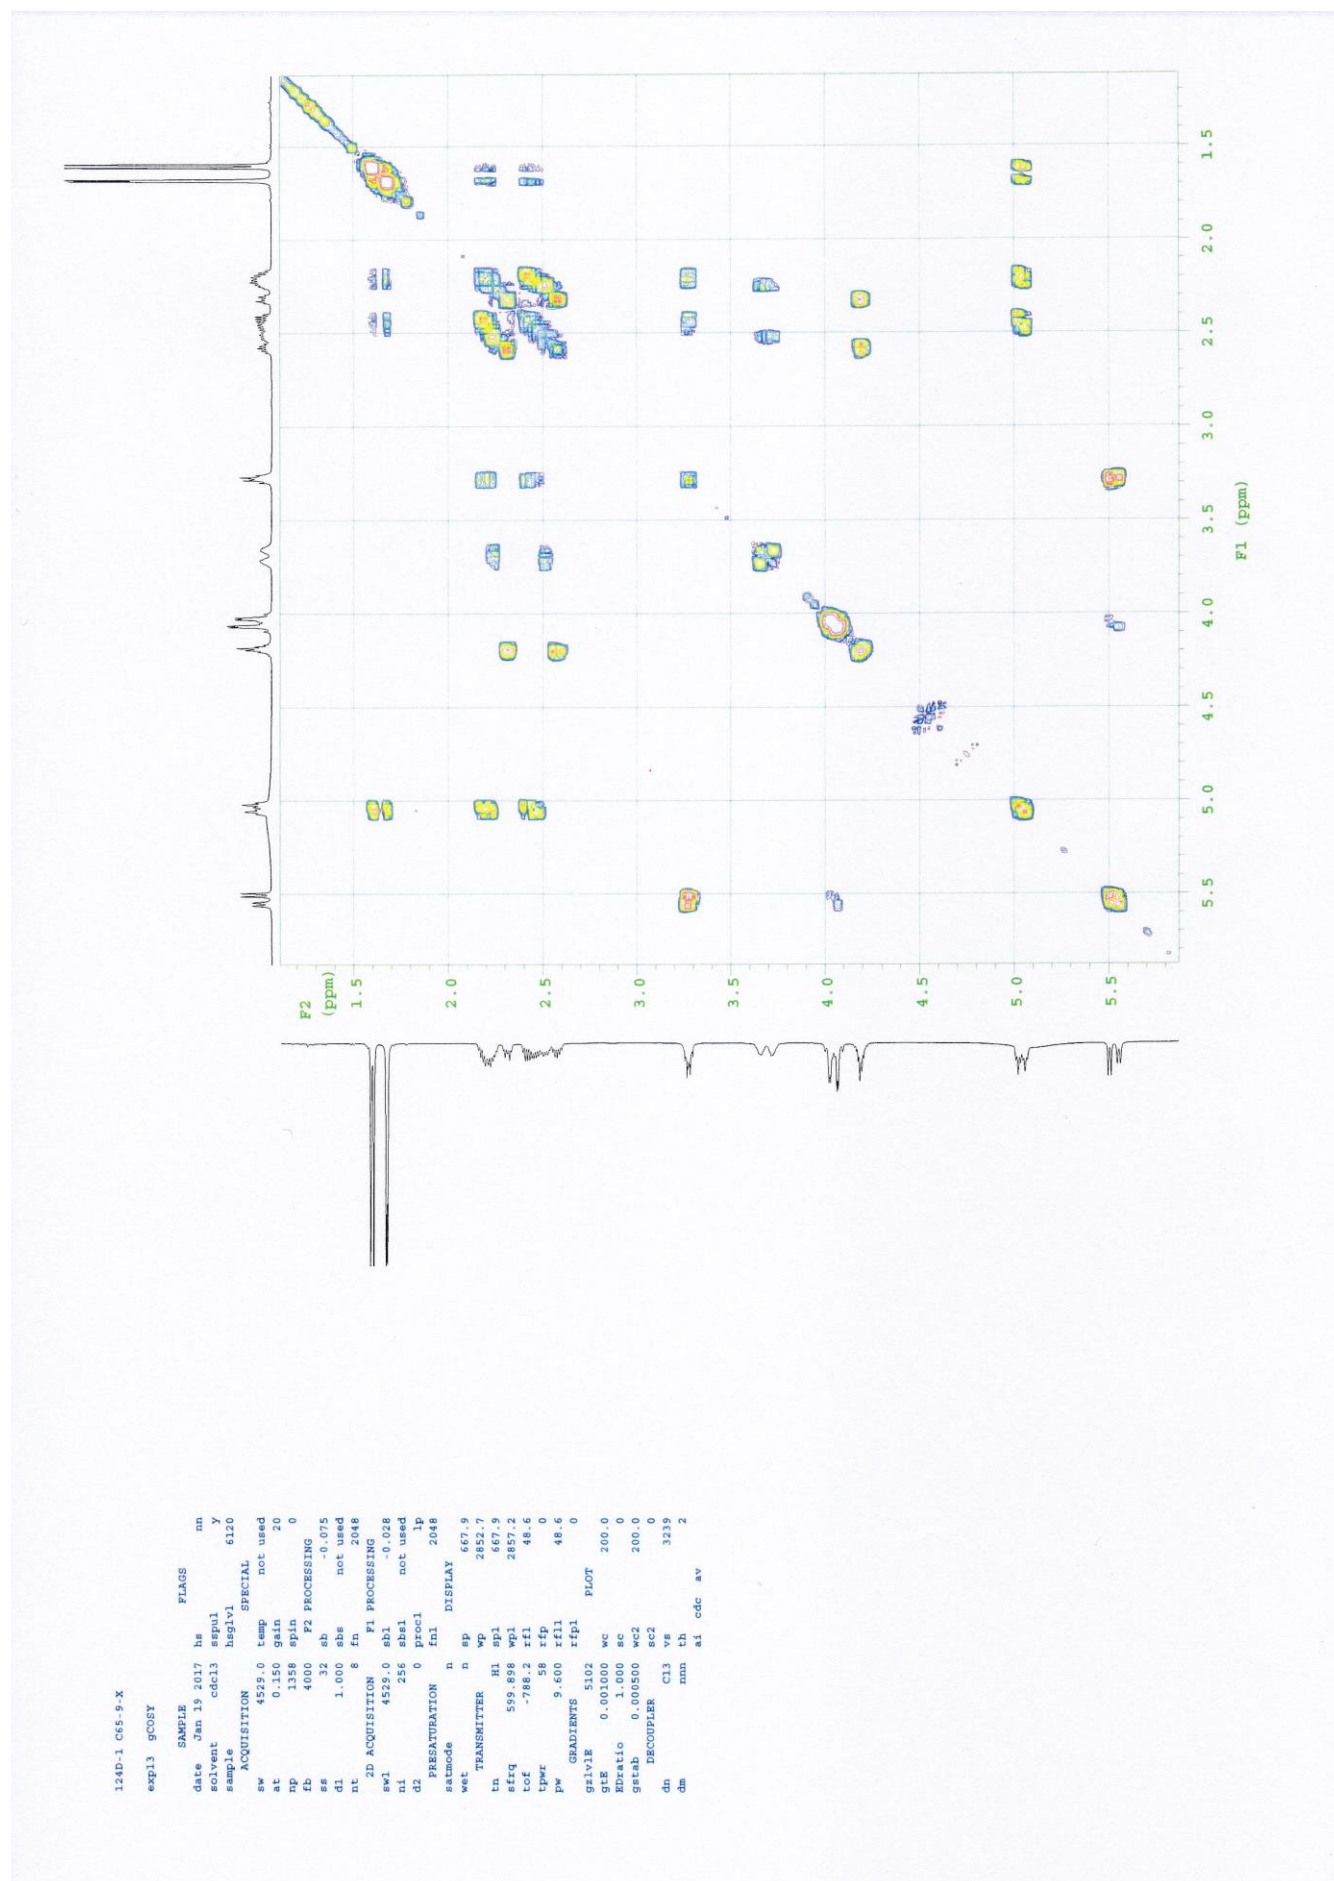

Figure S16 NOESY of 3

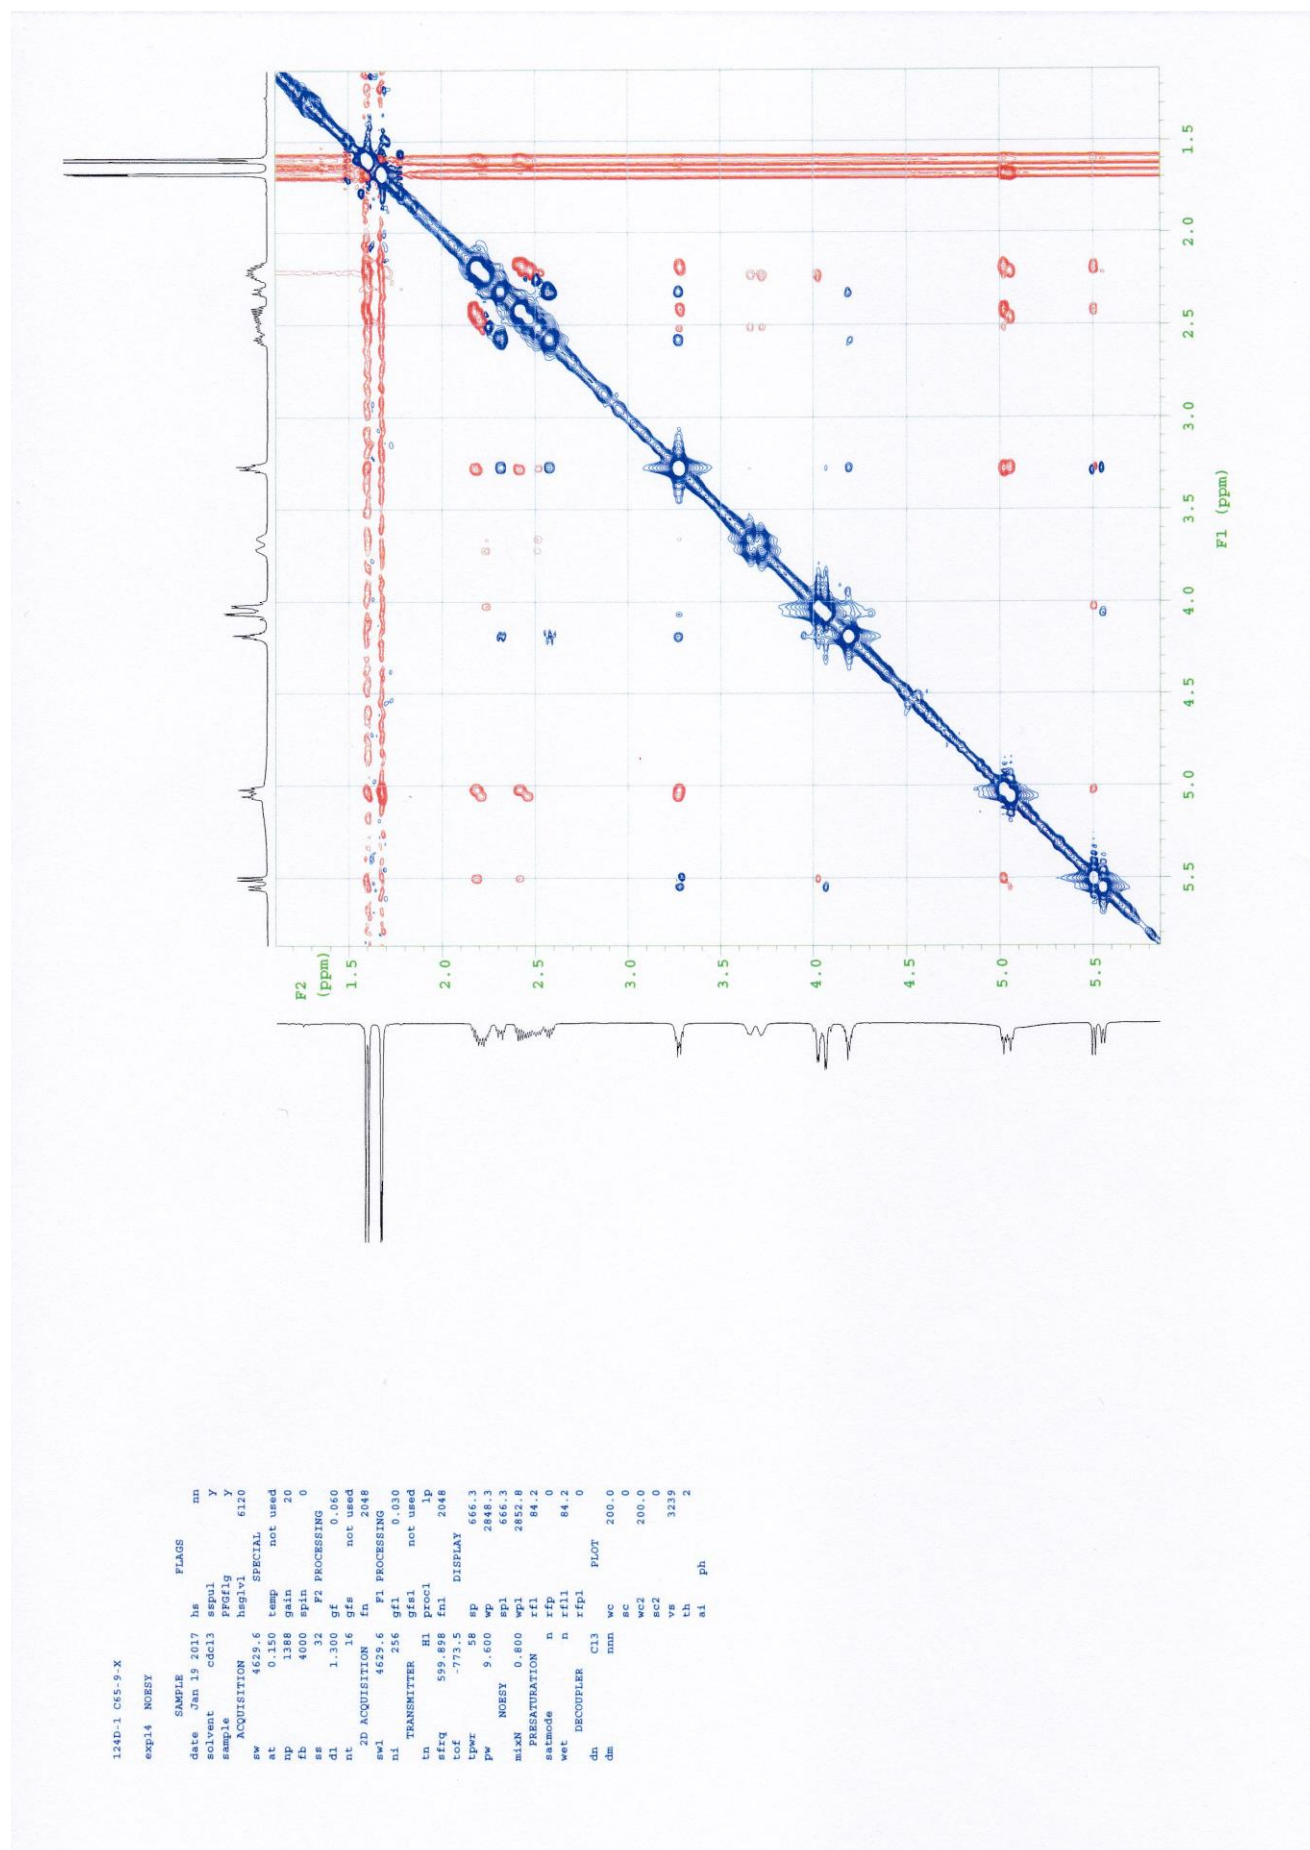

Figure S17 HMQC of 3

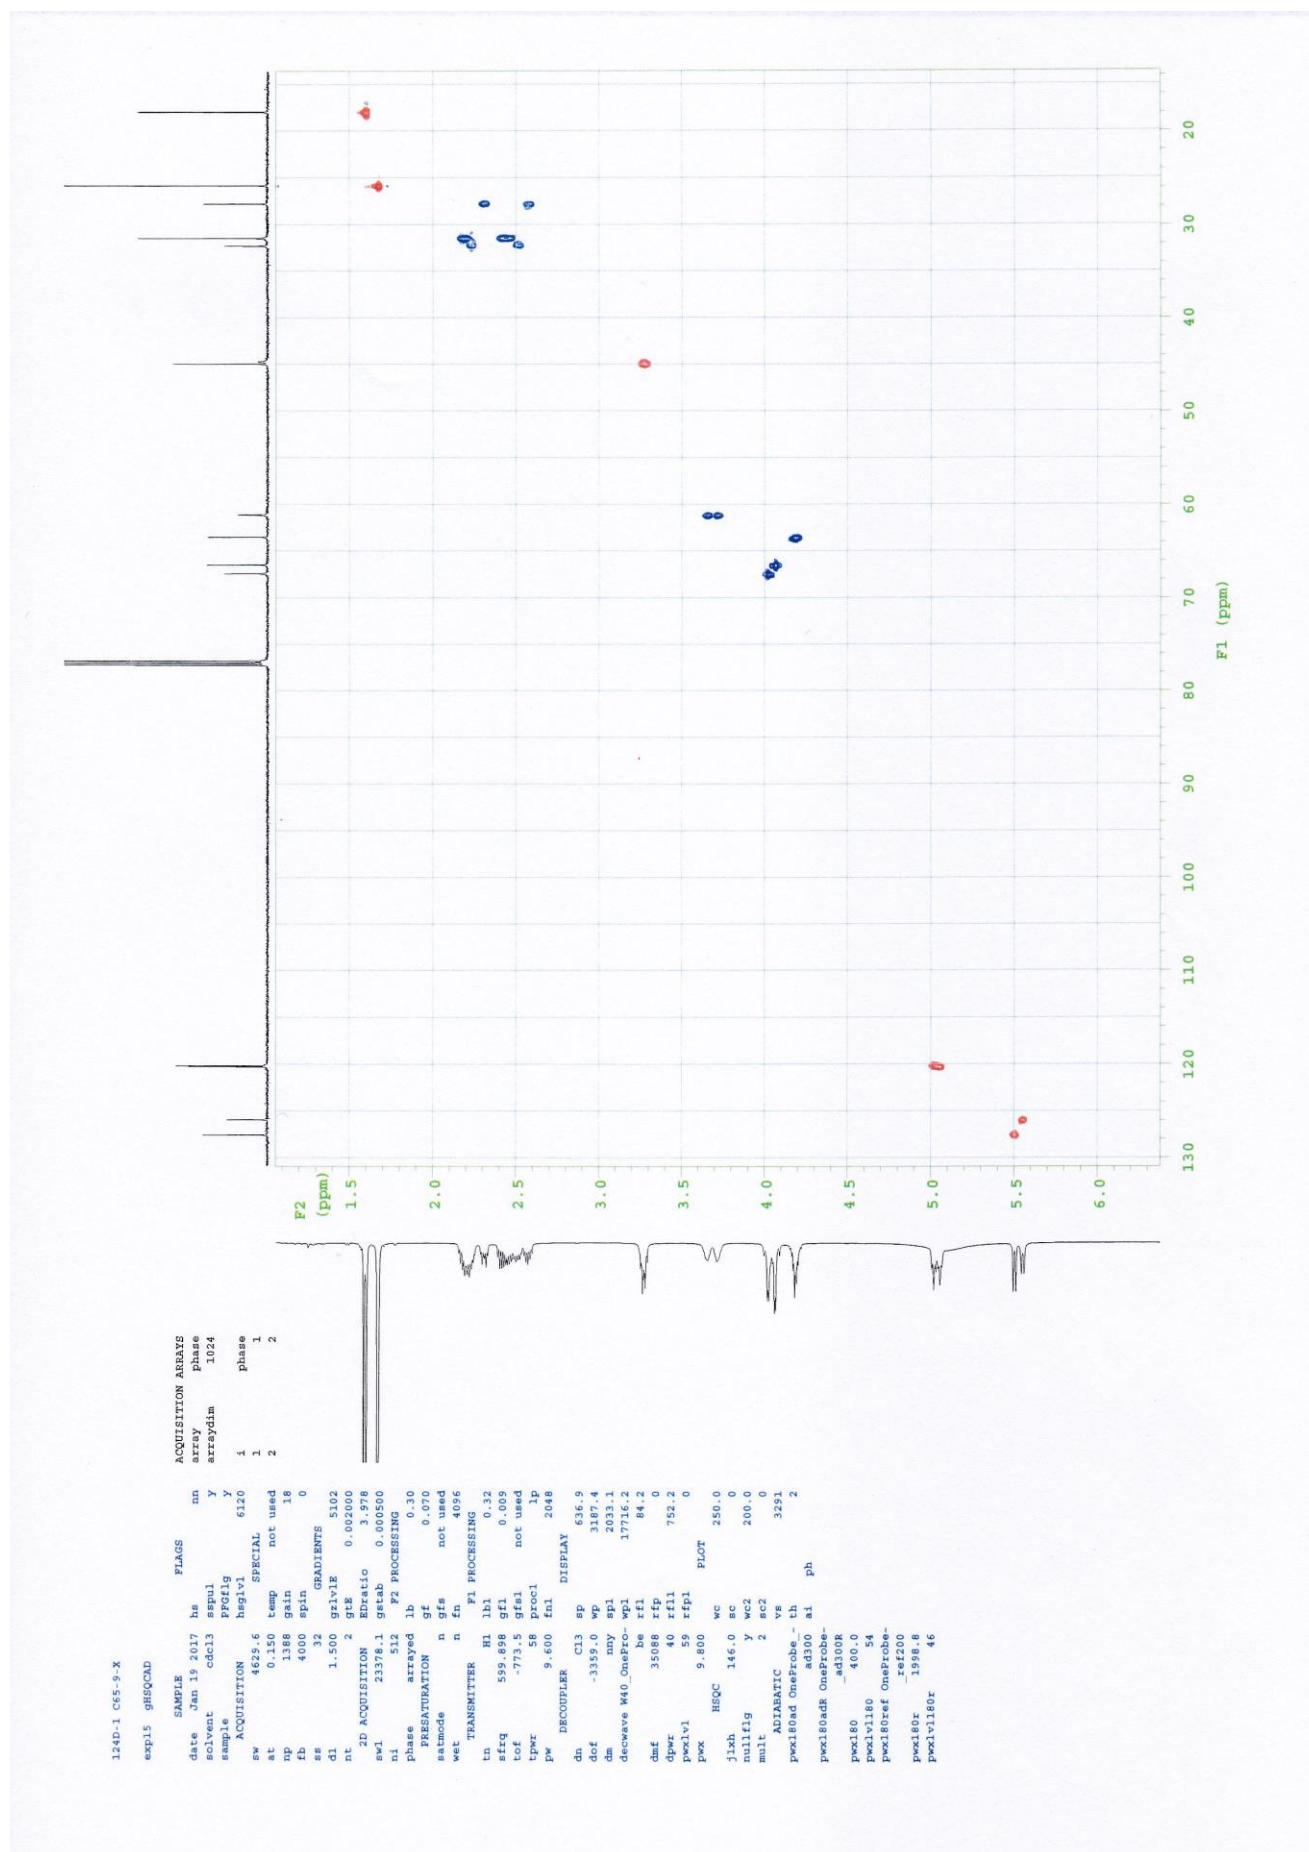



Figure S18 HMBC of 3

124D-1 C55-9-X

exp16 ghmrcad

| SAMPLE           |               | FLAGS         |          | ACQUISITION ARRAYS |       |
|------------------|---------------|---------------|----------|--------------------|-------|
| date             | Jan 19 2017   | ha            | nn       | array              | Phase |
| solvent          | cdcl3         | sspl          | Y        | arraydim           | 1024  |
| sample           | cdcl3         | PFflg         | Y        |                    |       |
| sw               | 4629.6        | bsplv1        | 6120     | i                  | 1     |
| at               | 0.150         | temp          | not used | 2                  | 2     |
| np               | 1388          | gain          | 18       |                    |       |
| fb               | 4000          | spin          | 0        |                    |       |
| ss               | 32            | GRADIENTS     |          |                    |       |
| d1               | 1.500         | g2lv11        | 510      |                    |       |
| nt               | 32            | g1            | 0.001000 |                    |       |
| 2D ACQUISITION   | g2lv13        | 1530          |          |                    |       |
| sw1              | 29873.0       | g13           | 0.001000 |                    |       |
| ni               | 512           | gstab         | 0.000500 |                    |       |
| Phase            | arrayed       | F2 PROCESSING |          |                    |       |
| PRESATURATION    | sb            | -0.075        |          |                    |       |
| satmode          | n             | abs           | not used |                    |       |
| wet              | n             | fn            | 4096     |                    |       |
| TRANSMITTER      | F1 PROCESSING |               |          |                    |       |
| tn               | H1            | gfl           | 0.005    |                    |       |
| sfrq             | 599.898       | gfl           | not used |                    |       |
| tof              | -773.5        | procl         | lp       |                    |       |
| tpwr             | 58            | fn1           | 2048     |                    |       |
| pw               | 9.600         | DISPLAY       |          |                    |       |
| DECOUPLER        | sp            | 695.7         |          |                    |       |
| dn               | CL3           | wp            | 2952.3   |                    |       |
| dof              | 184.4         | sp1           | 1323.3   |                    |       |
| dm               | nmn           | wp1           | 26051.4  |                    |       |
| decwave          | W40_OneProc   | rfl           | 84.2     |                    |       |
| be               | rfl           | 0             |          |                    |       |
| dmf              | 35088         | rfl1          | 456.2    |                    |       |
| dpr              | 40            | rfl1          | 0        |                    |       |
| Pwlv1            | 59            | PLOT          |          |                    |       |
| Pwz              | 9.800         | wc            | 250.0    |                    |       |
| j1xh             | RHEC          | sc            | 0        |                    |       |
| j1xh             | 146.0         | wc2           | 200.0    |                    |       |
| j1xh             | 8.0           | sc2           | 0        |                    |       |
| ADIAETATIC       | vs            | 3291          |          |                    |       |
| Pwlv16ad_OneProc | th            | 2             |          |                    |       |
| Pwlv16ad         | ad100         | ai            | av       |                    |       |
| Pwlv160          | 54            |               |          |                    |       |
| Pwlv160          | 400.0         |               |          |                    |       |

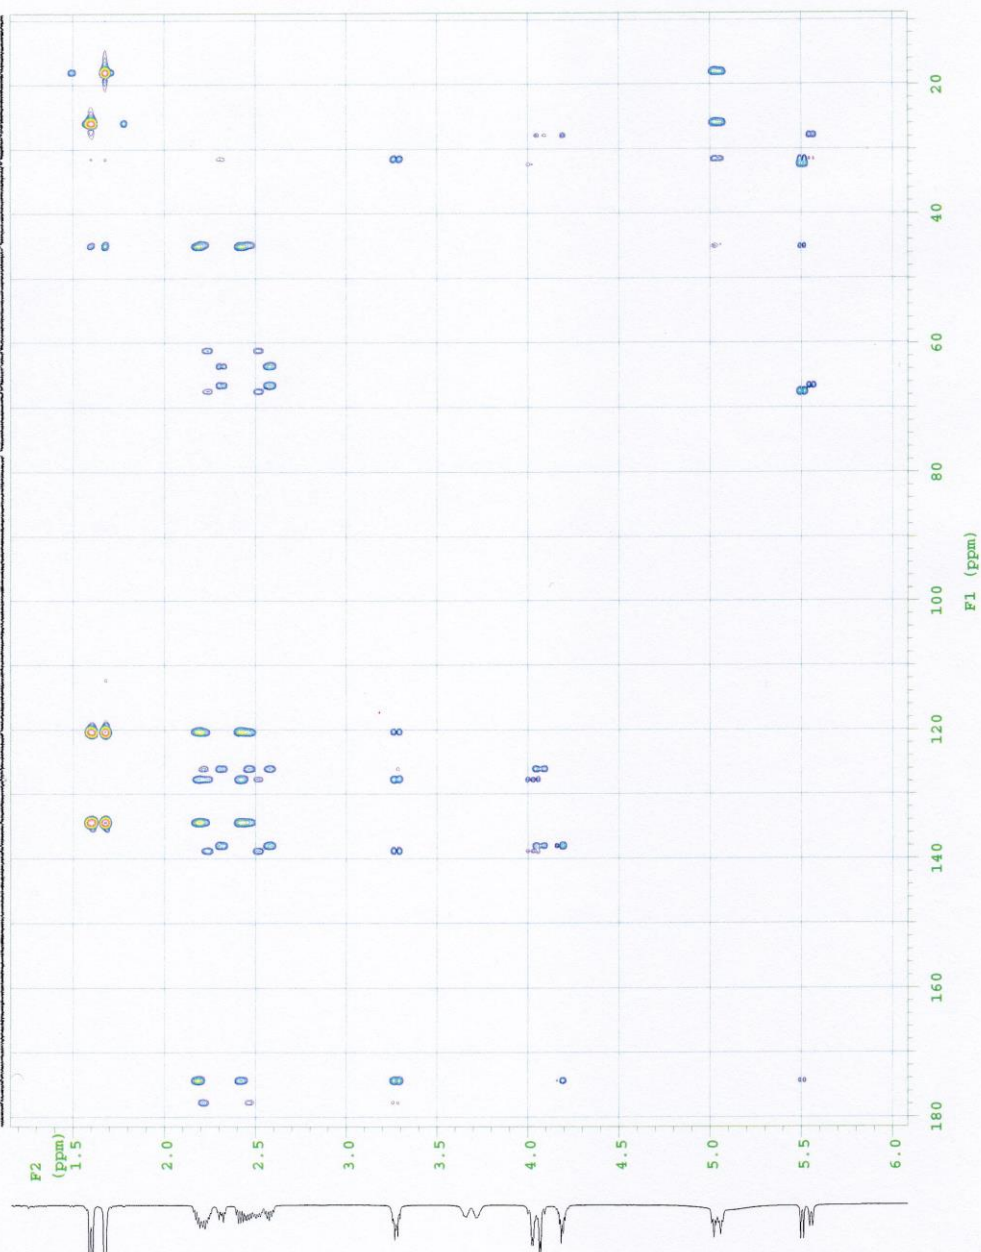



Figure S19  $^1\text{H}$  NMR spectra of 4 in  $\text{CDCl}_3$

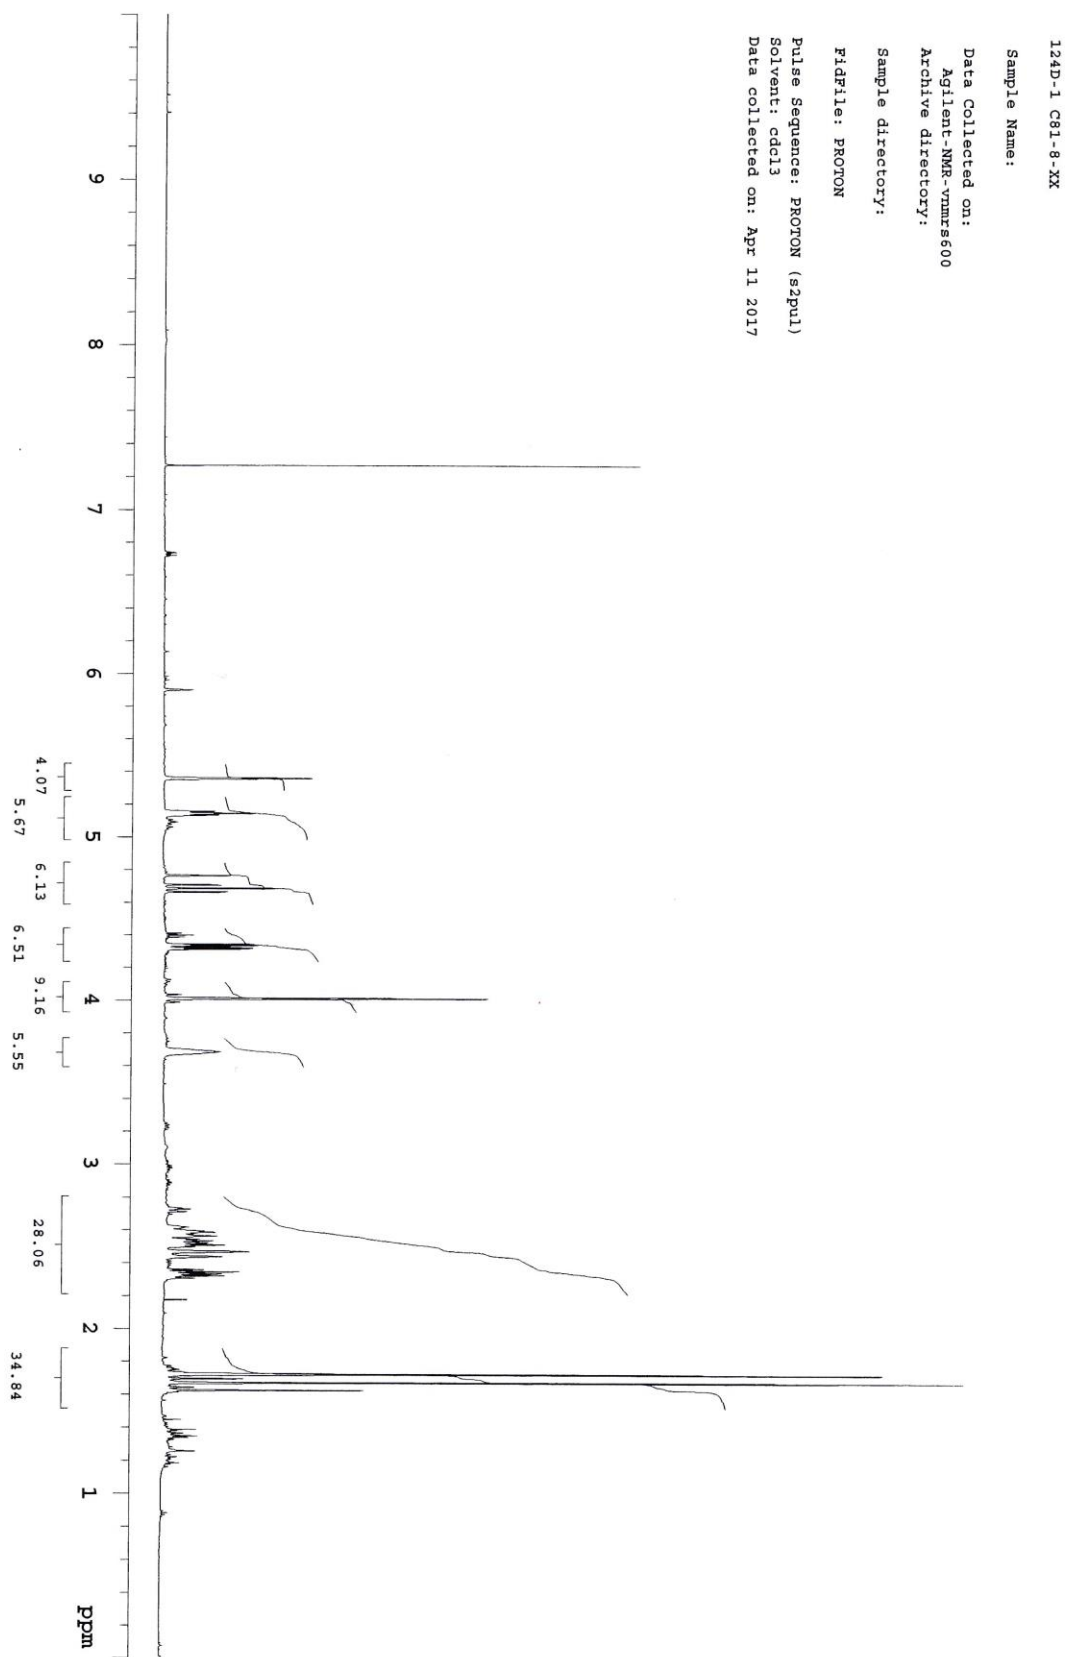

Figure S20  $^{13}\text{C}$  NMR spectra of 4 in  $\text{CDCl}_3$

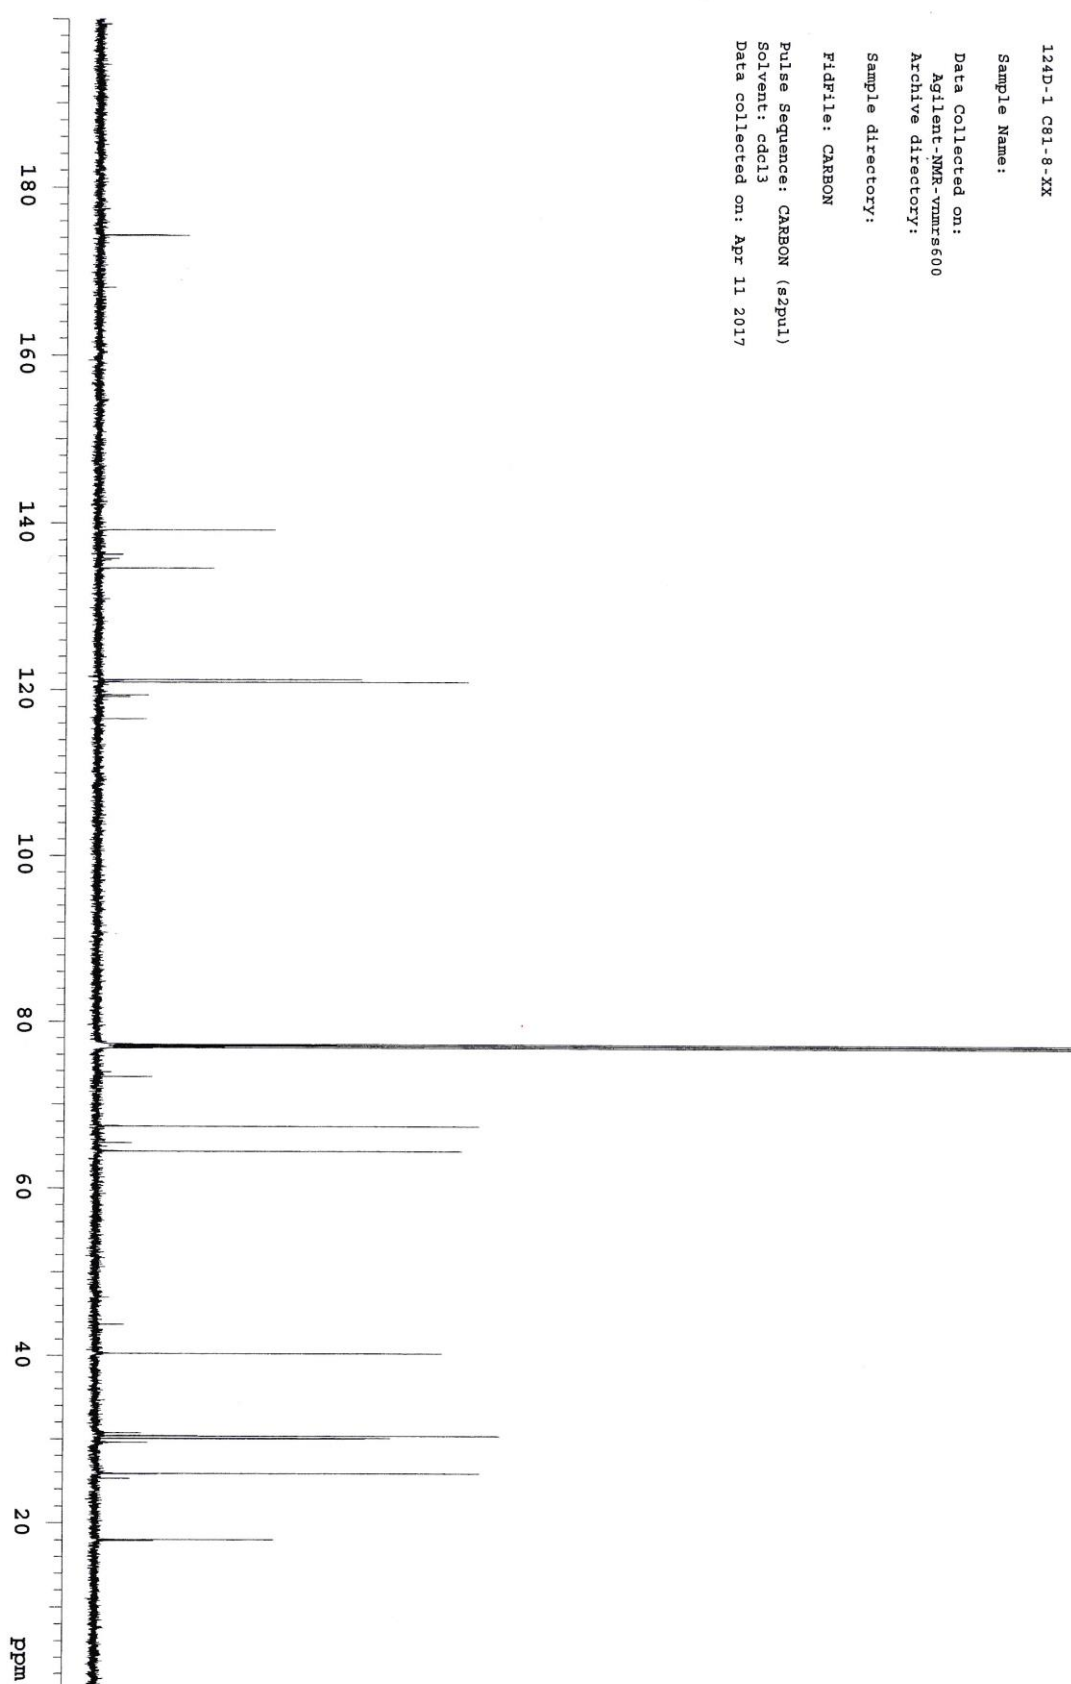

Figure S21  $^1\text{H}$ - $^1\text{H}$  COSY of 4

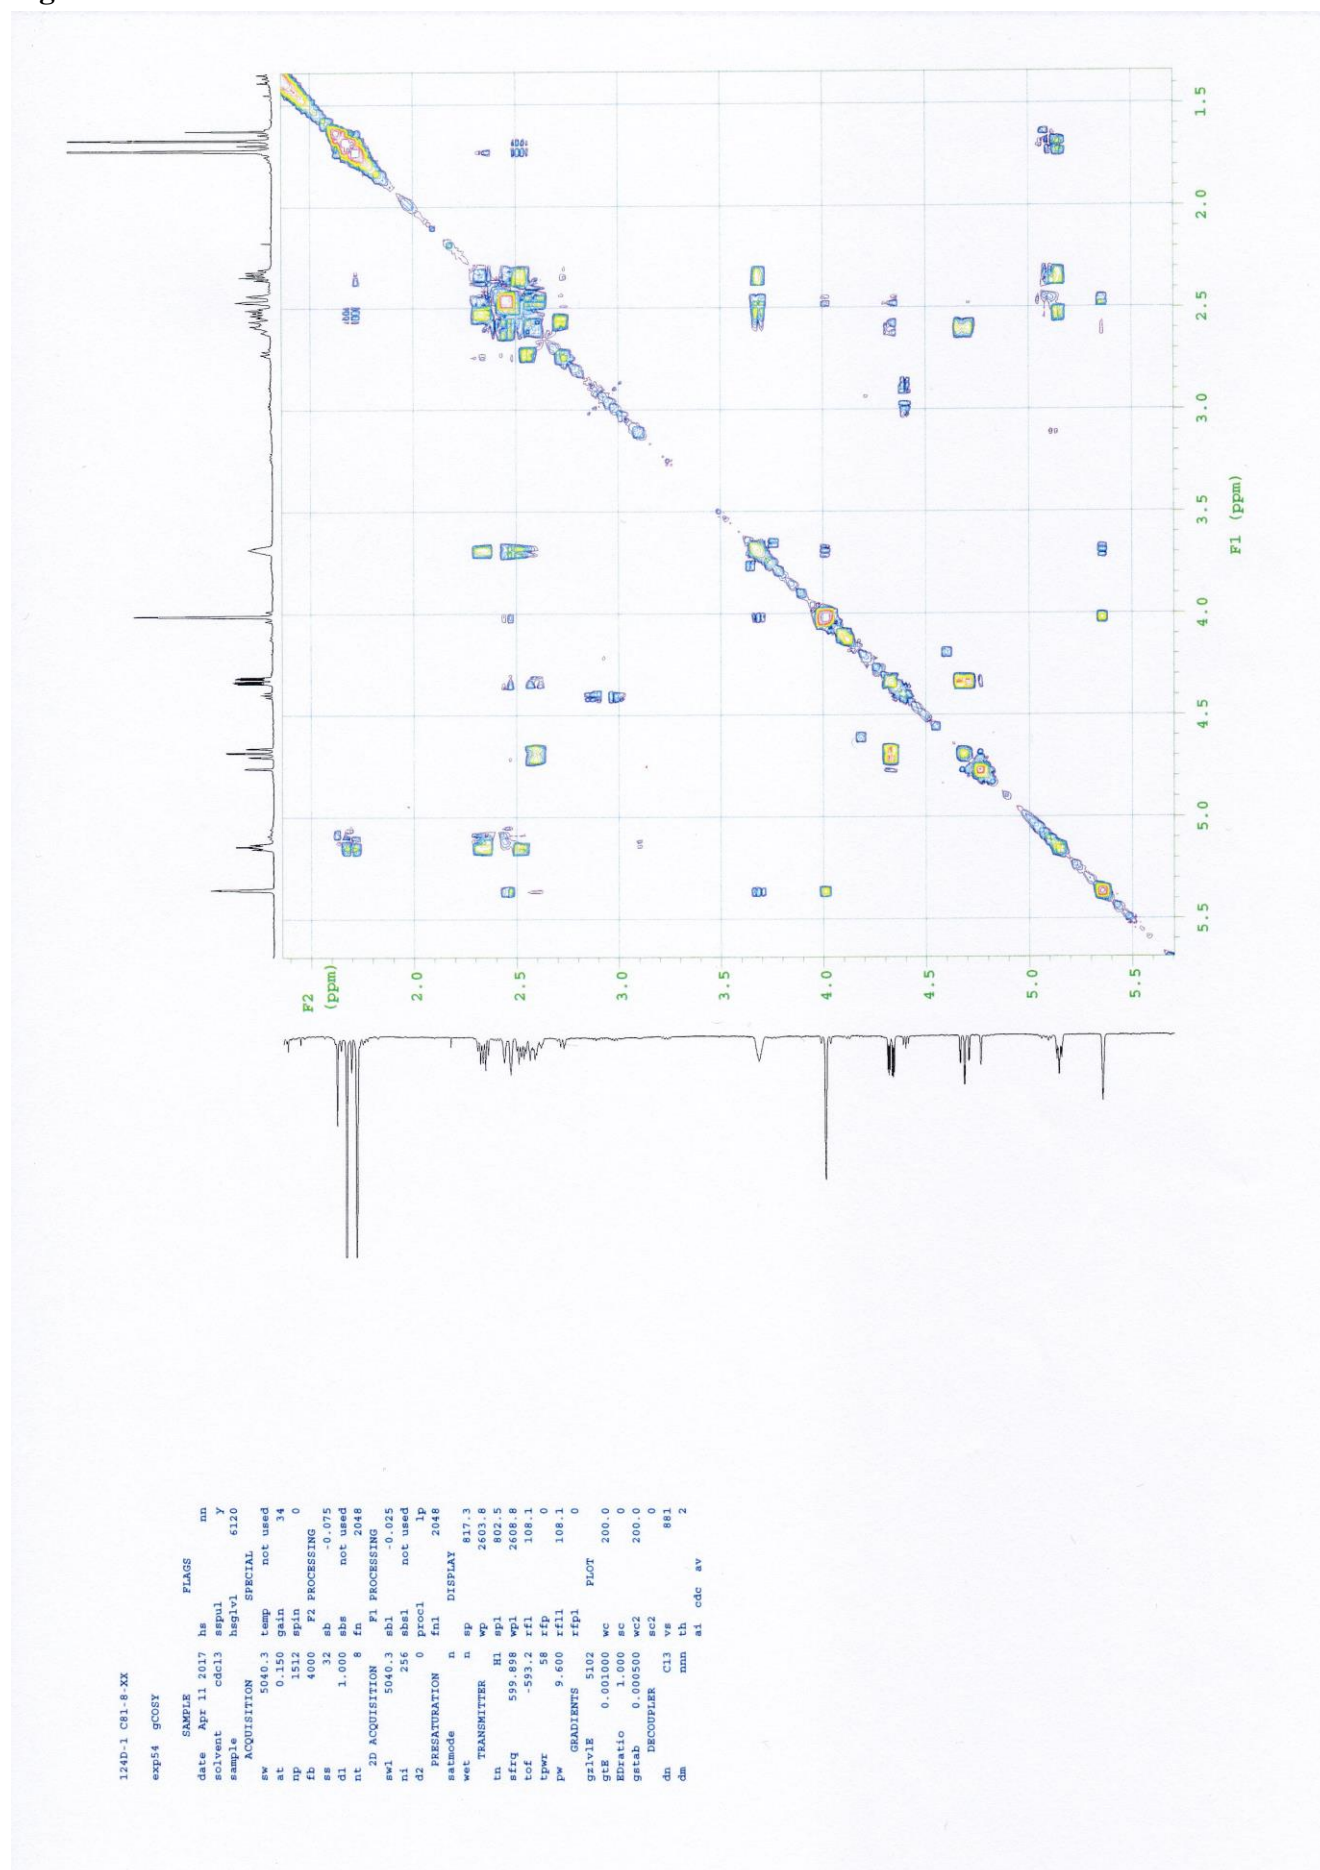

Figure S22 NOESY of 4<sup>+</sup>

124D-1 C81-8-XX

exp57 NOESY

| SAMPLE         |             | FLAGS         |          |
|----------------|-------------|---------------|----------|
| date           | Apr 11 2017 | hs            | nn       |
| solvent        | cdcl3       | ascul         | y        |
| sample         | cdcl3       | ppcgl         | y        |
| ACQUISITION    | hspcl       | 6120          |          |
| sw             | 4807.7      | SPECIAL       |          |
| at             | 0.150       | temp          | not used |
| tp             | 1442        | gain          | 34       |
| fb             | 4000        | spin          | 0        |
| ss             | 32          | P2 PROCESSING |          |
| d1             | 1.300       | gf            | 0.060    |
| nt             | 16          | gfs           | not used |
| 2D ACQUISITION | fn          | 2048          |          |
| sw1            | 4807.7      | F1 PROCESSING |          |
| ni             | 256         | gf1           | 0.030    |
| TRANSMITTER    | H1          | proc1         | lp       |
| tn             | 559.898     | fn1           | 2048     |
| tof            | -738.1      | DISPLAY       |          |
| tpwr           | 58          | sp            | 816.4    |
| pw             | 9.600       | wp            | 2601.0   |
| mixN           | NOESY       | sp1           | 802.3    |
| PREPARATION    | 0.800       | wp1           | 2605.7   |
| satmode        | n           | rfl           | 136.7    |
| wet            | n           | rfl1          | 136.7    |
| DECOUPLER      | CL3         | rfpl          | 0        |
| dn             | mm          | wc            | 200.0    |
| dm             | sc          | sc            | 0        |
|                | WC2         | WC2           | 200.0    |
|                | SC2         | SC2           | 0        |
|                | VS          | VS            | 881      |
|                | th          | cdc           | 2        |
|                | al          | ph            |          |

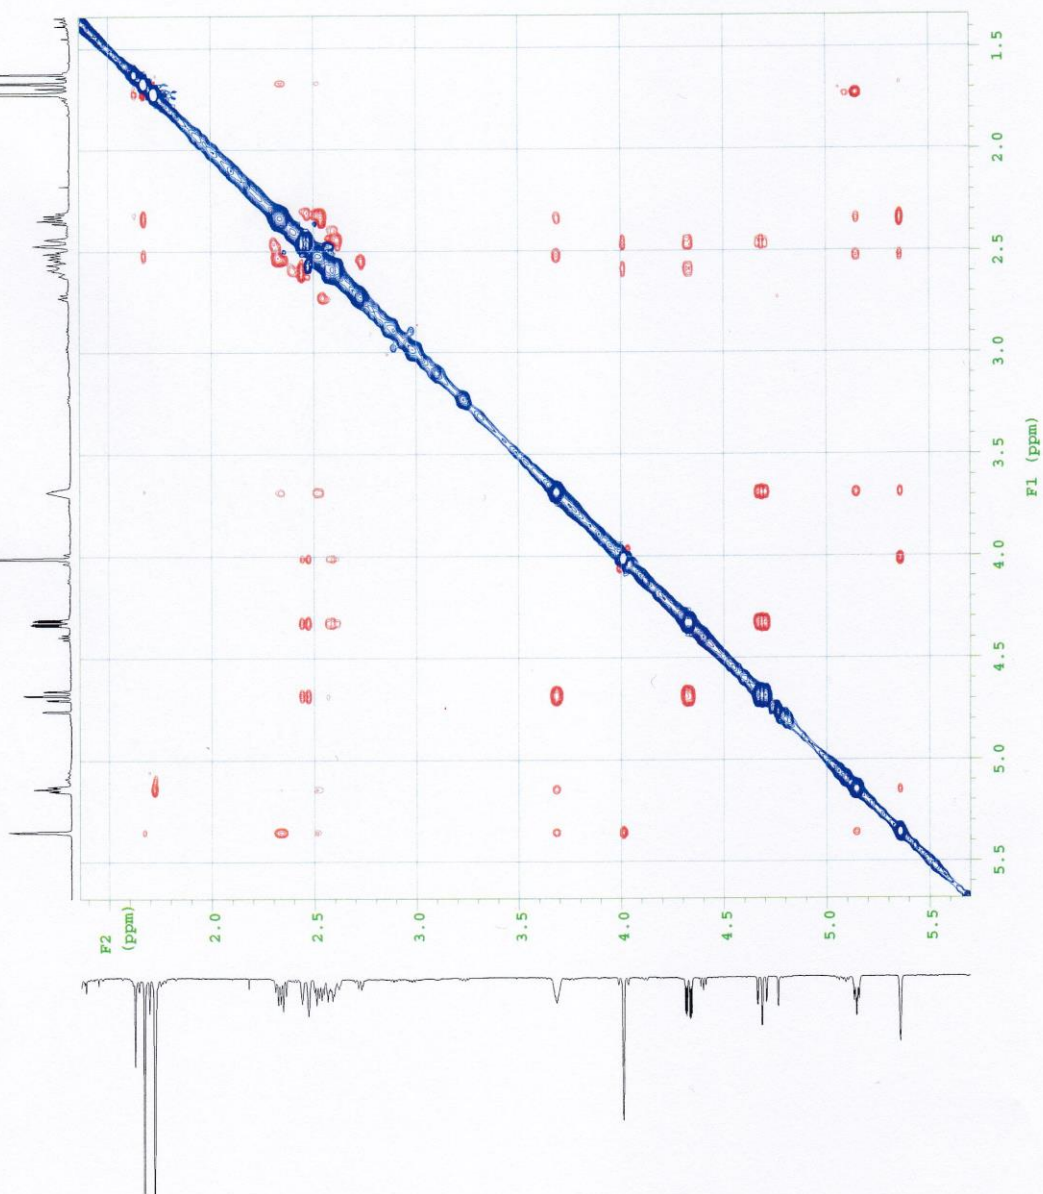



124D-1 C81-8-XX  
exp55 ghsqcad

SAMPLE  
date Apr 11 2017  
solvent cdcl3  
sample  
ACQUISITION  
sw 4807.7  
at 0.150 temp  
np 1442 gain  
fb 4000 spin  
ss 32  
dl 1.500  
nt 2  
2D ACQUISITION  
sw1 24434.9  
Phase arrayed 1b  
PRESATURATION 1b  
satmode n  
wet n

FLAGS  
nn  
y  
y  
SPECIAL  
not used  
30  
0  
GRADIENTS  
5102  
0.002000  
3.278  
0.000500  
30  
0.070  
not used  
4896

ACQUISITION ARRAYS  
array phase  
arraydim 1024  
i phase  
1 1  
2 2

F2 (ppm)  
1.5  
2.0  
2.5  
3.0  
3.5  
4.0  
4.5  
5.0  
5.5  
6.0  
6.5

F1 (ppm)  
120  
110  
100  
90  
80  
70  
60  
50  
40  
30  
20

tn hl 1b1 0.32  
sfreq 599.898 qf1 0.009  
tof -738.1 qfsl not used  
tpwr 58 procl lp  
pw 9.600 fml 2048

DECOUPLER C13 sp 490.1  
dn -2380.0 wp 3415.6  
dm mny sp1 2251.7  
decwave W40\_OnePro-wp1 16536.5  
be rfl 136.7  
dmf 35088 rfp 0  
qpr 40 rfil 301.6  
pwx1v1 59 rfp1 0  
pwx 9.800 wc 250.0

HSQC  
j1zh 146.0 sc 0  
nullfg y wc2 200.0  
smut 2 sc2 2098  
ADJADYATIC  
pwx180ad OneProbe-  
ad300 al cdc ph  
pwx180ad OneProbe-  
ad300R  
pwx180 400.0  
pwx1v1180 54  
pwx180ref OneProbe-  
ref200  
pwx180r 1998.8  
pwx1v1180r 46

Figure S24 HMBC of 4

124D-1 C81-s-xx

exp60 ghmCAD

| SAMPLE         |             | FLAGS    |          | ACQUISITION ARRAYS |       |
|----------------|-------------|----------|----------|--------------------|-------|
| date           | Apr 11 2017 | hs       | tn       | array              | phase |
| solvent        | cdcl3       | ssol     | y        | arraydim           | 1024  |
| sample         | profirg     | y        |          |                    |       |
| acq            | 4807.7      | ssol     | 6120     | 1                  | 1     |
| acq            | 4807.7      | ssol     | 6120     | 2                  | 2     |
| at             | 0.150       | temp     | not used |                    |       |
| fb             | 1482        | gain     | 30       |                    |       |
| fb             | 4000        | spin     | 0        |                    |       |
| dl             | 1.500       | gr1v1    | 510      |                    |       |
| nt             | 32          | gr1v1    | 510      |                    |       |
| 2D ACQUISITION | gr1v1       | 0.001000 |          |                    |       |
| sw             | 30464.6     | gr1v1    | 1530     |                    |       |
| ni             | 512         | gr1v1    | 0.000500 |                    |       |
| Phase          | arrayed     | gr1v1    | 0.000500 |                    |       |
| PRESSATURATION | sb          | gr1v1    | 0.075    |                    |       |
| satmode        | n           | gr1v1    | not used |                    |       |
| wet            | n           | gr1v1    | 4096     |                    |       |
| TRANSMITTER    |             |          |          |                    |       |
| tn             | H1          | gr1v1    | 0.005    |                    |       |
| sfreq          | 599.898     | gr1v1    | not used |                    |       |
| to             | -738.1      | gr1v1    | 1p       |                    |       |
| tpwr           | 58          | gr1v1    | 2048     |                    |       |
| DECOUPLER      |             |          |          |                    |       |
| dn             | C13         | gr1v1    | 2115.1   |                    |       |
| dof            | 639.9       | gr1v1    | 2053.8   |                    |       |
| dm             | num         | gr1v1    | 25139.2  |                    |       |
| decwave        | W40         | gr1v1    | 136.7    |                    |       |
| be             | rfp         | gr1v1    | 0        |                    |       |
| dmf            | 35088       | gr1v1    | 296.5    |                    |       |
| dpr            | 40          | gr1v1    | 0        |                    |       |
| pmx            | 59          | gr1v1    | 250.0    |                    |       |
| pmx            | 9.800       | gr1v1    | 250.0    |                    |       |
| jlsh           | 146.0       | gr1v1    | 200.0    |                    |       |
| jsh            | 8.0         | gr1v1    | 2098     |                    |       |
| pmx180ad       | OneProbe_   | gr1v1    | 2        |                    |       |
| pmx180         | ad300       | gr1v1    | ai       |                    |       |
| pmx180         | 400.0       | gr1v1    | ai       |                    |       |

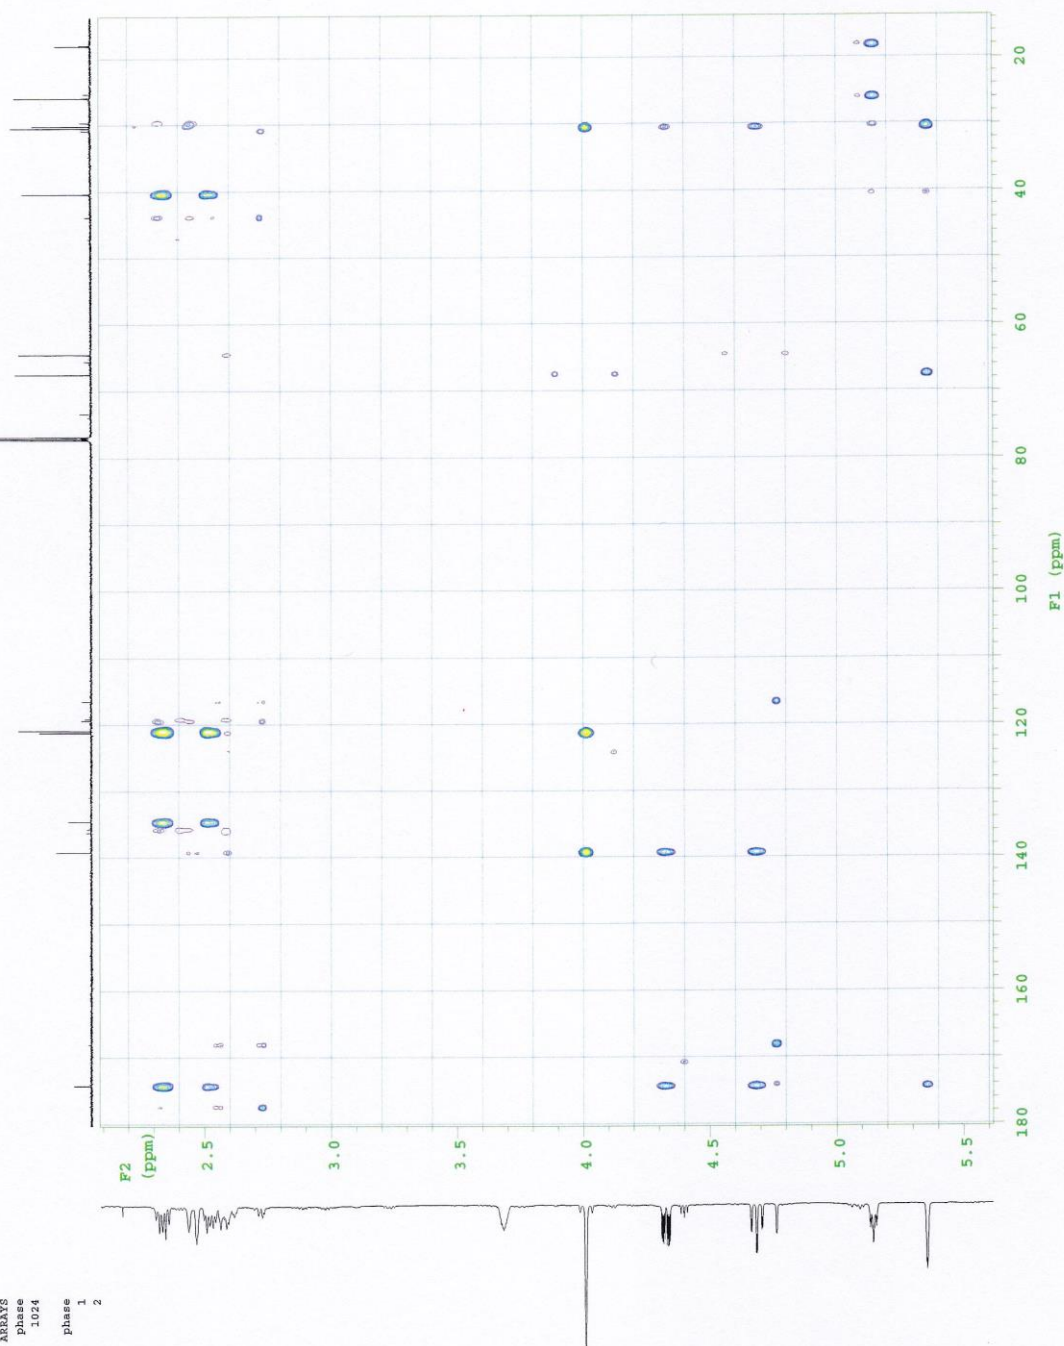



Figure S25  $^1\text{H}$  NMR spectra of 1a in  $\text{CDCl}_3$

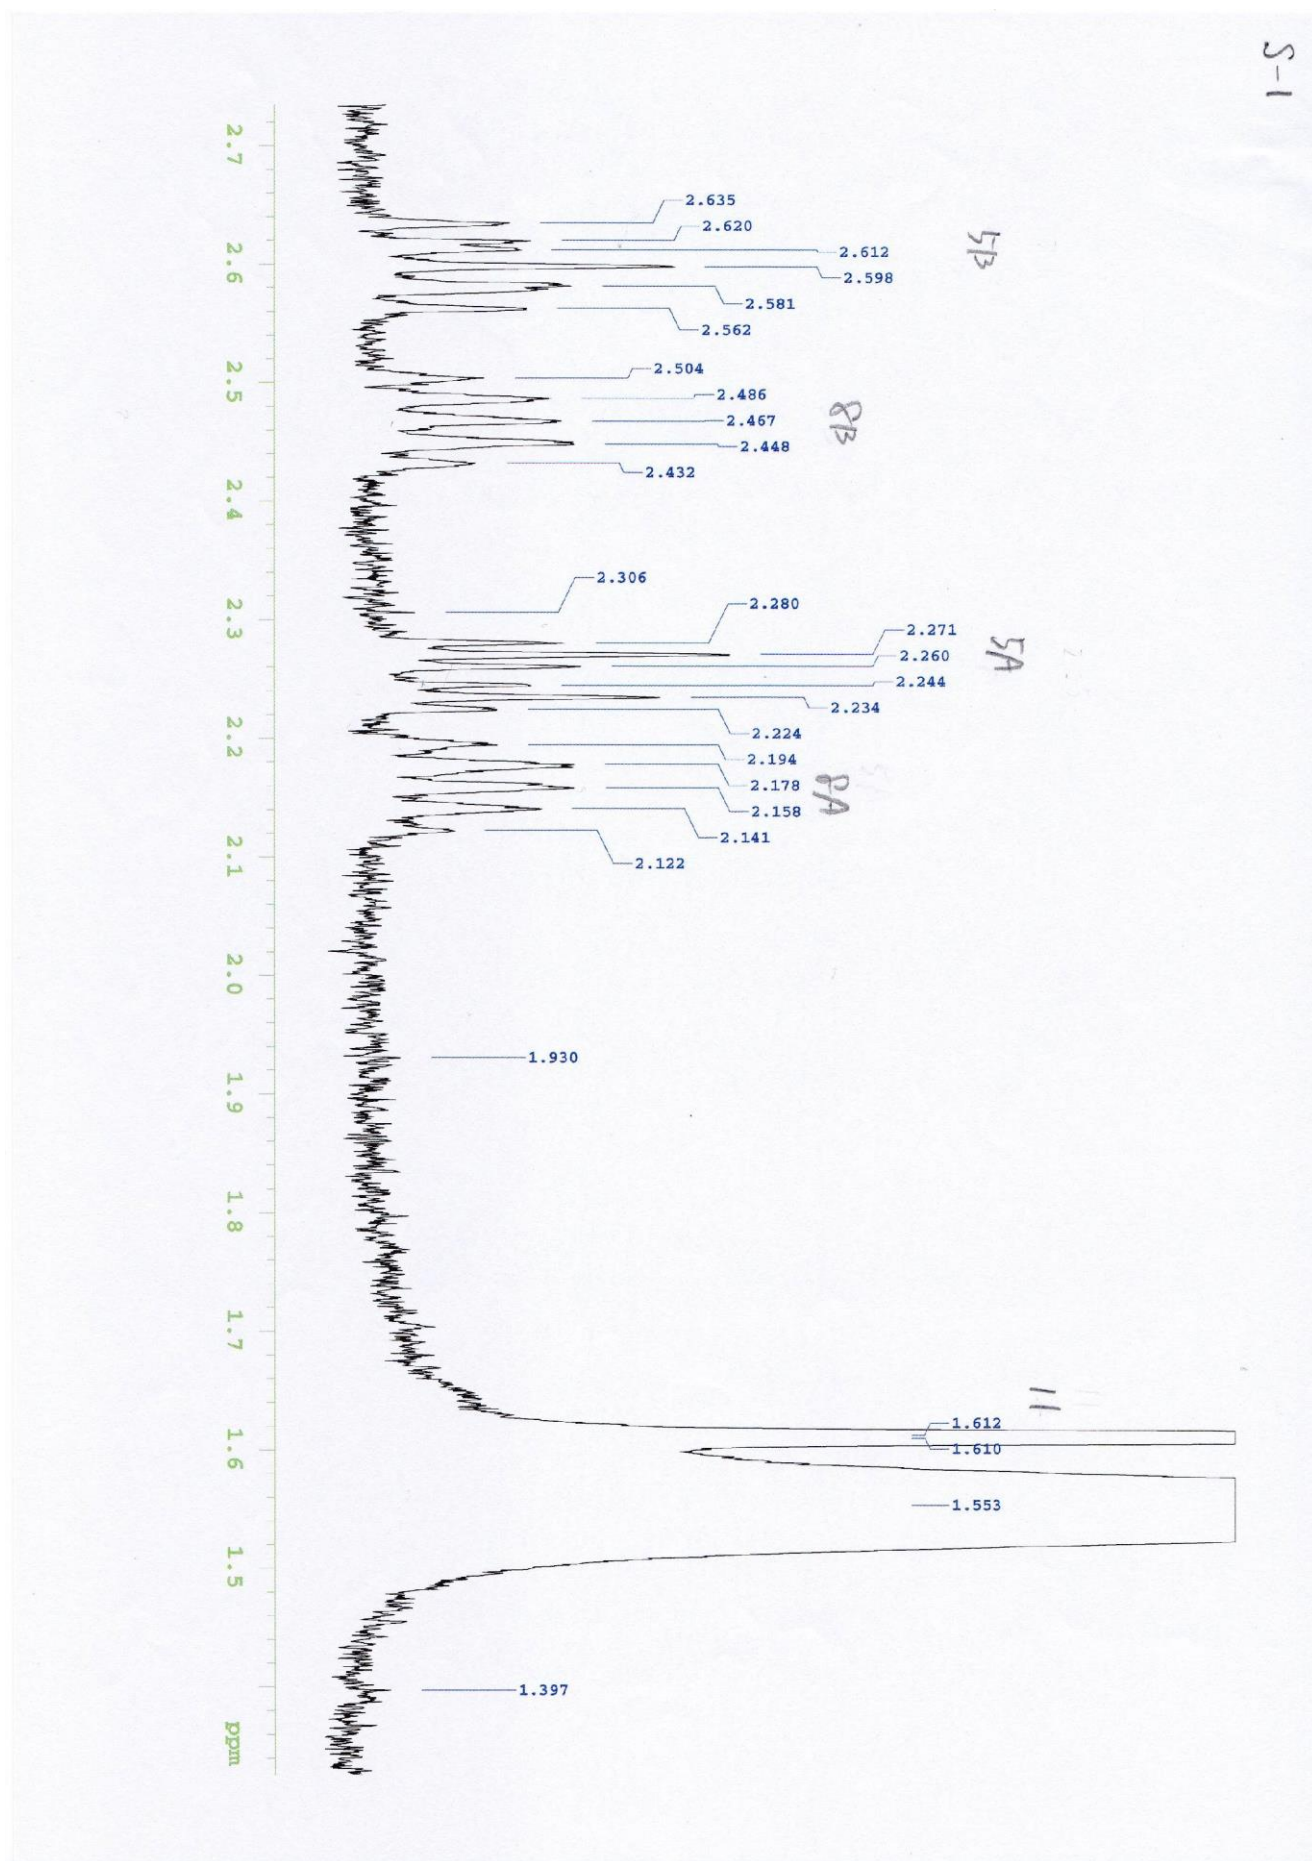

S-2

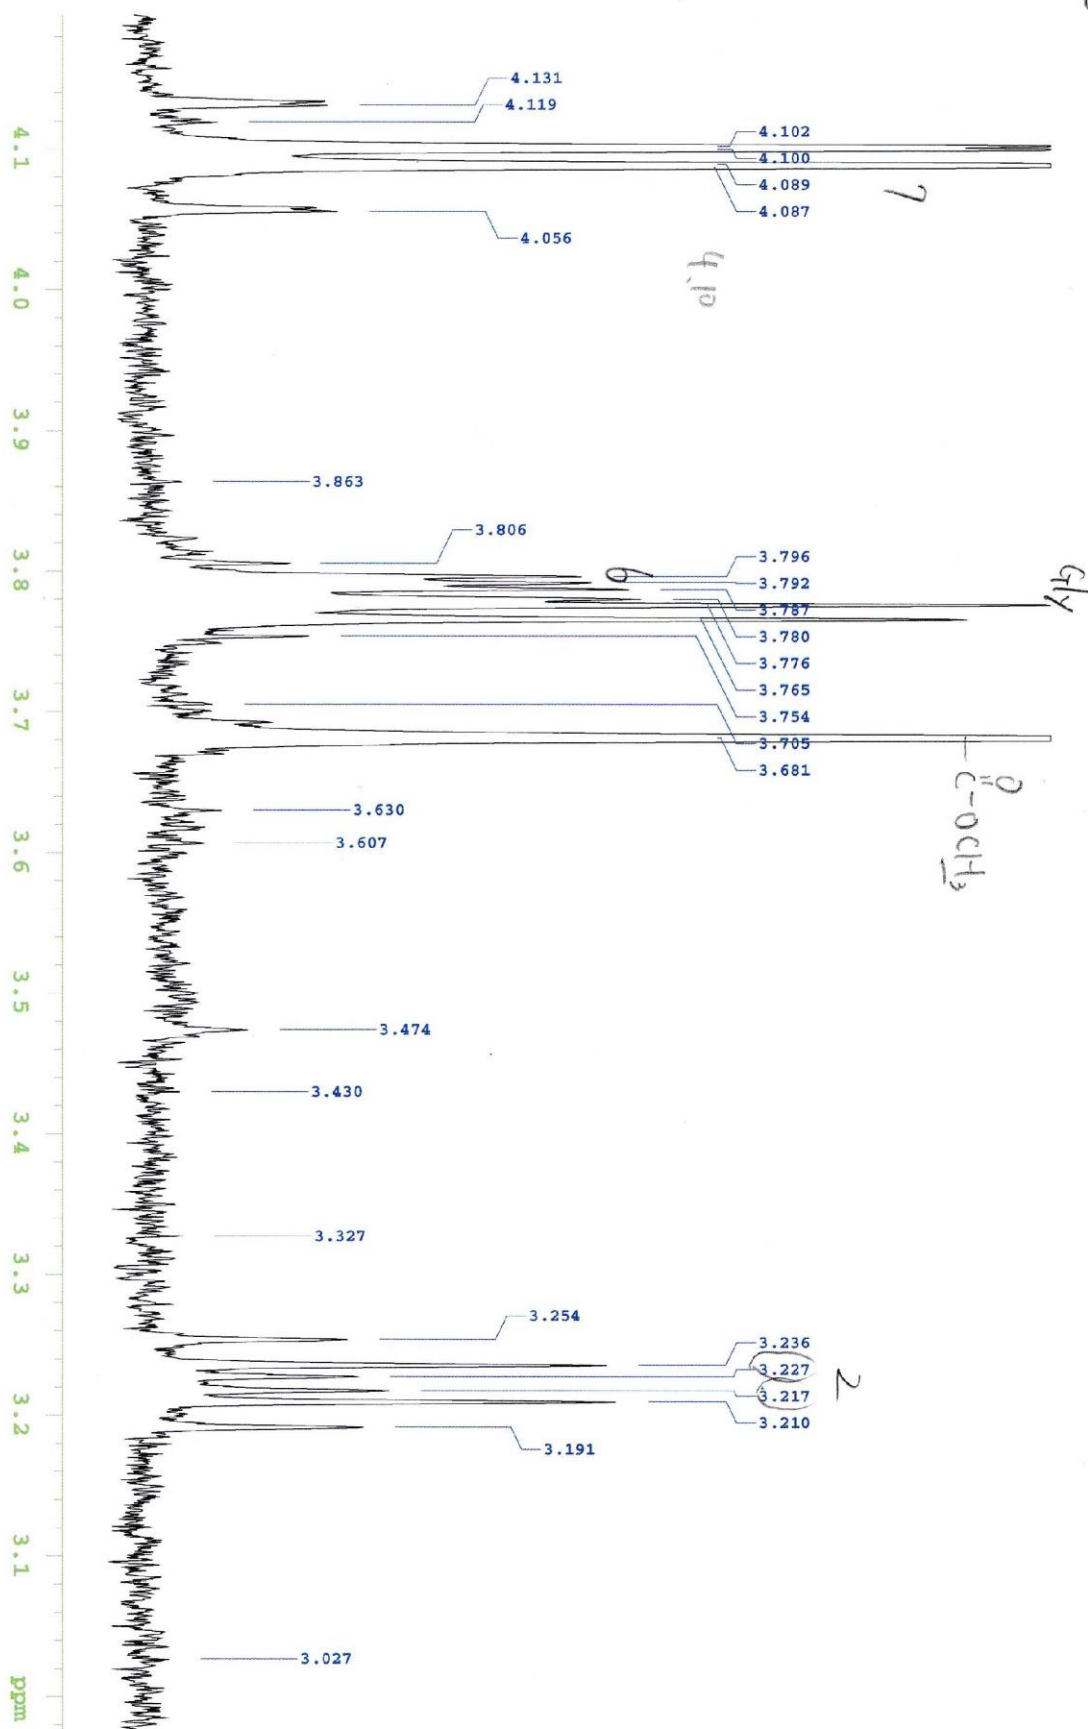



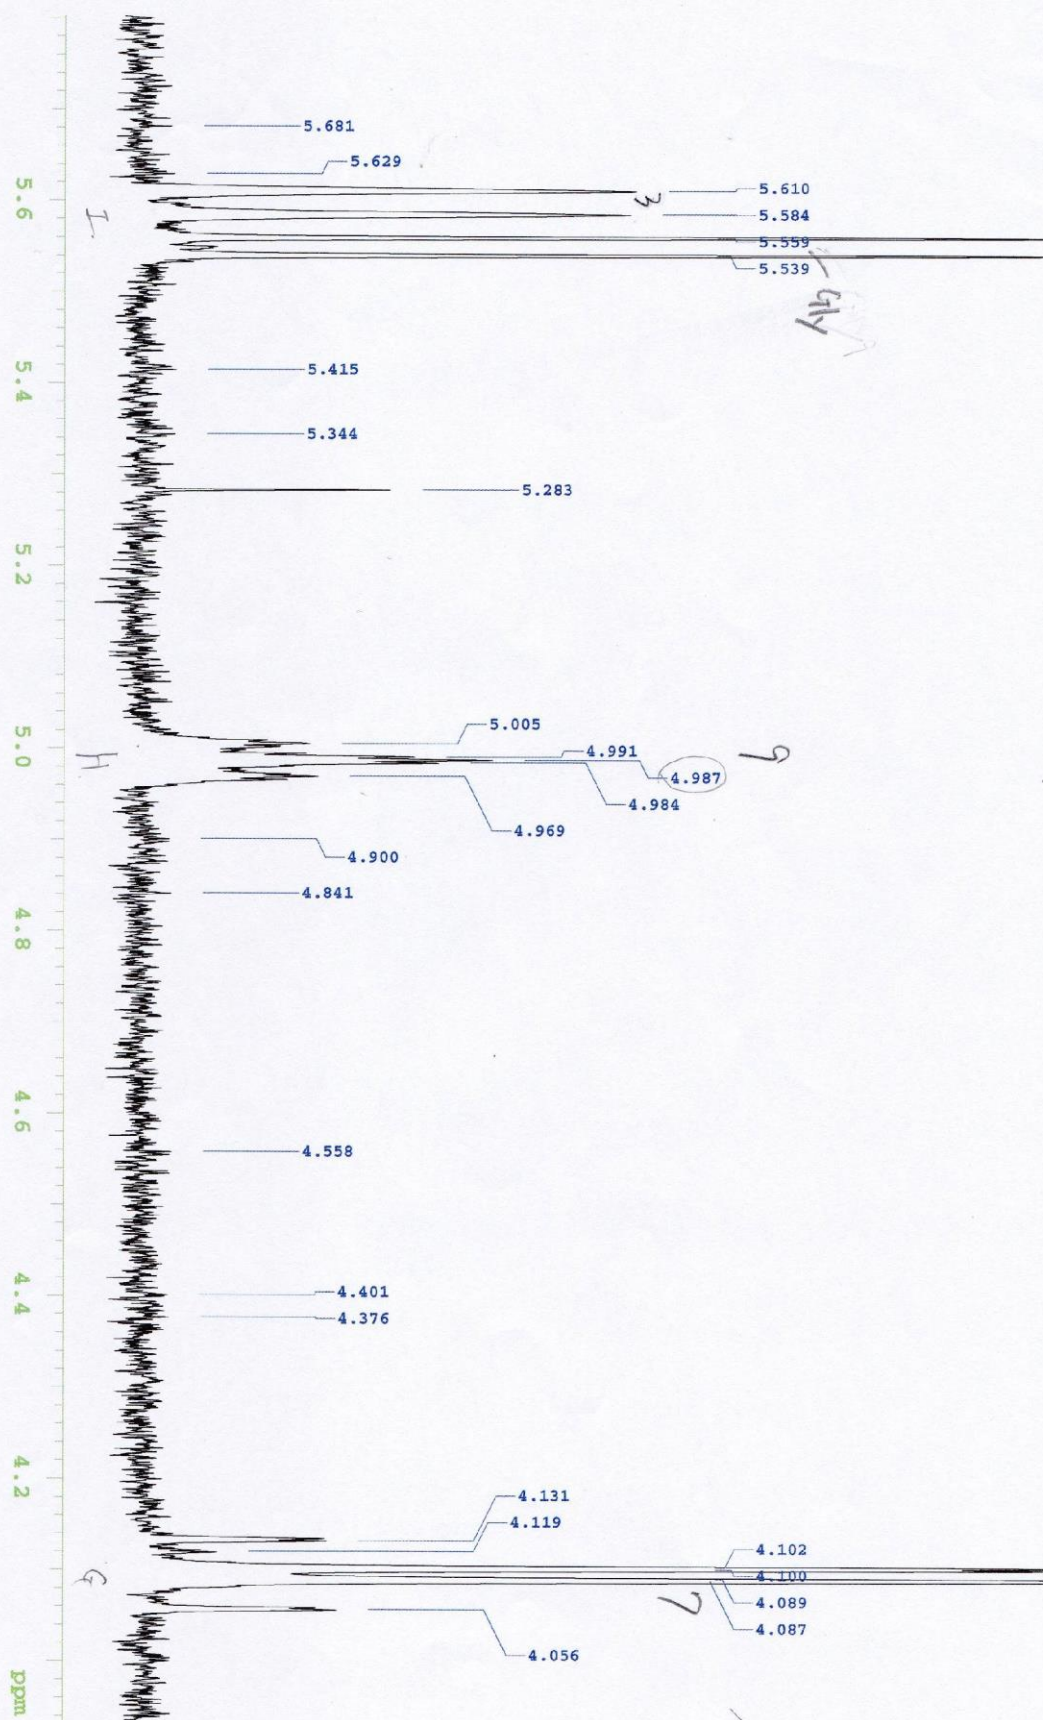

S-4

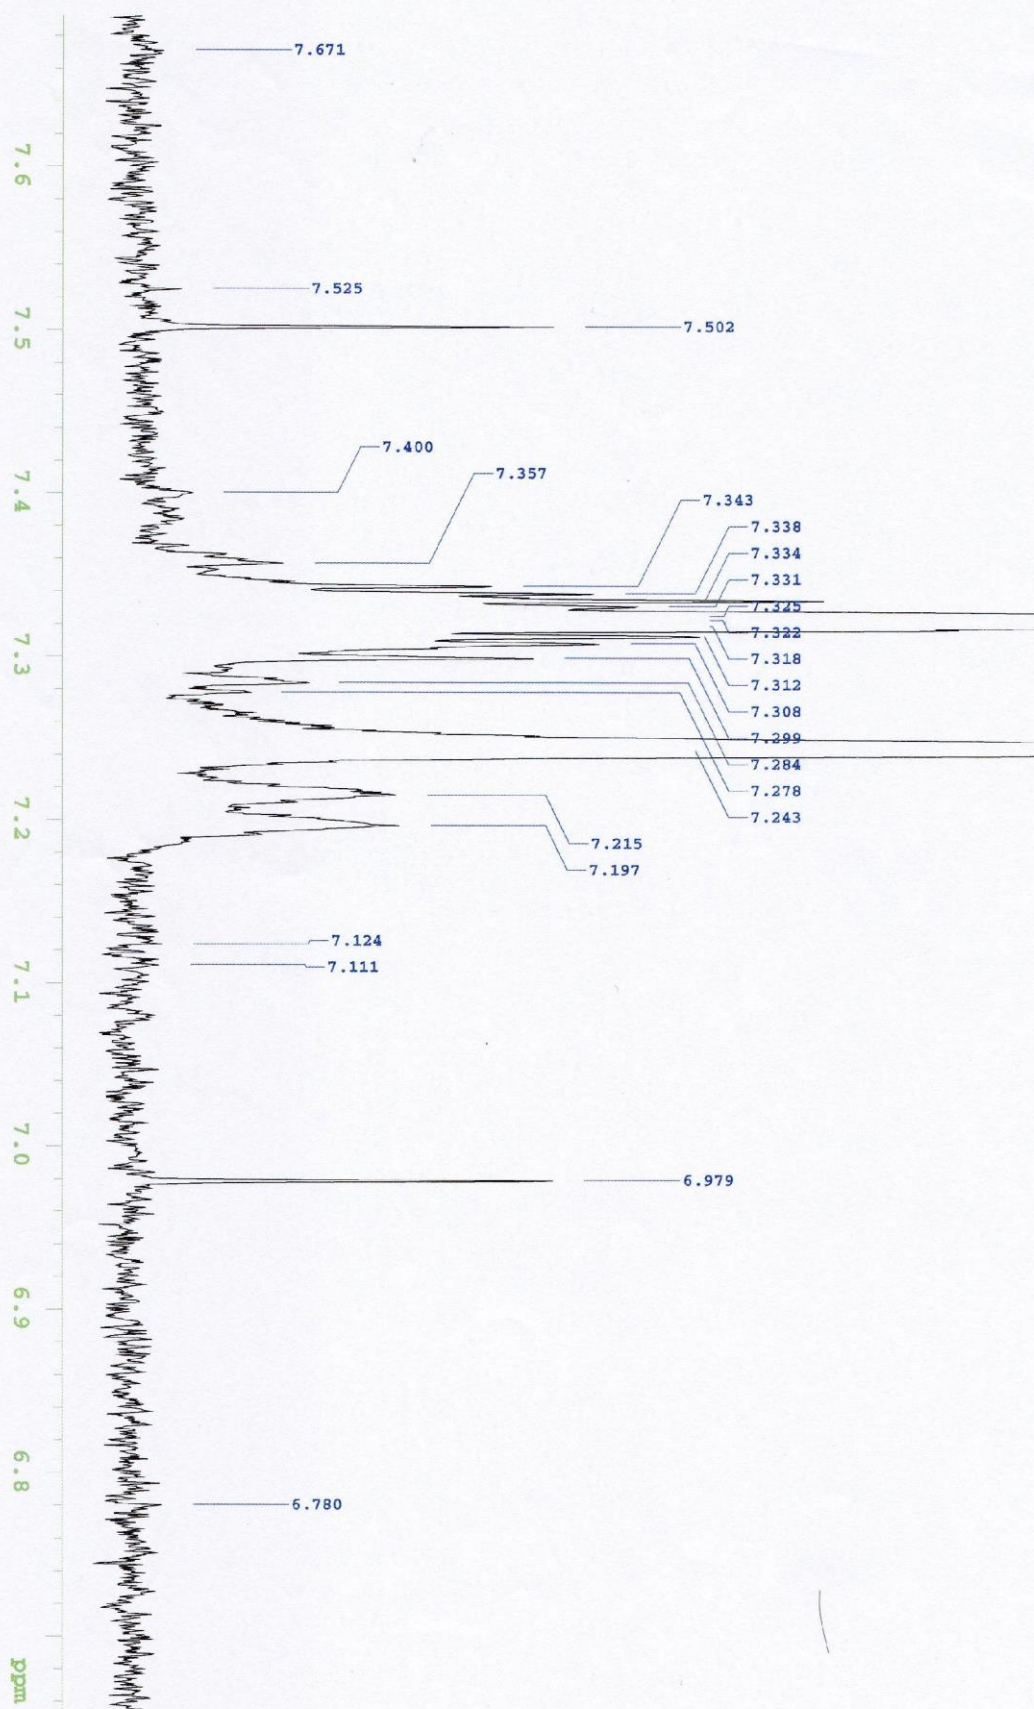

Figure S26  $^1\text{H}$  NMR spectra of 2a in  $\text{CDCl}_3$

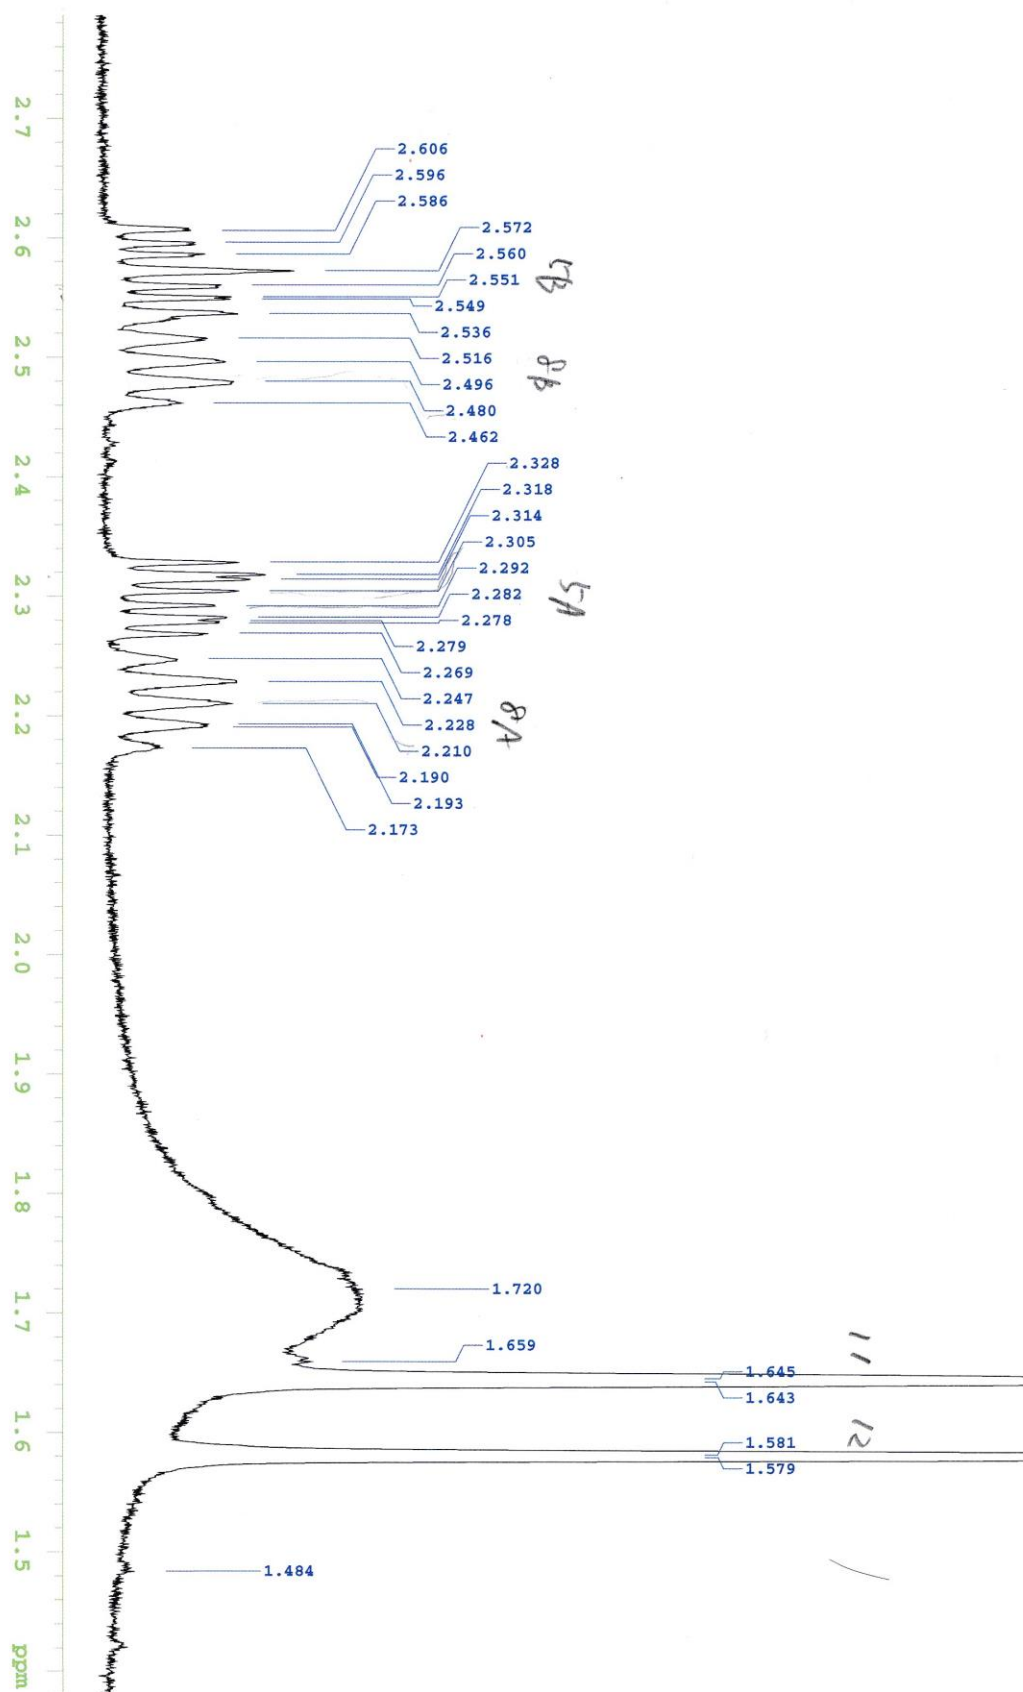

R-1



R-2

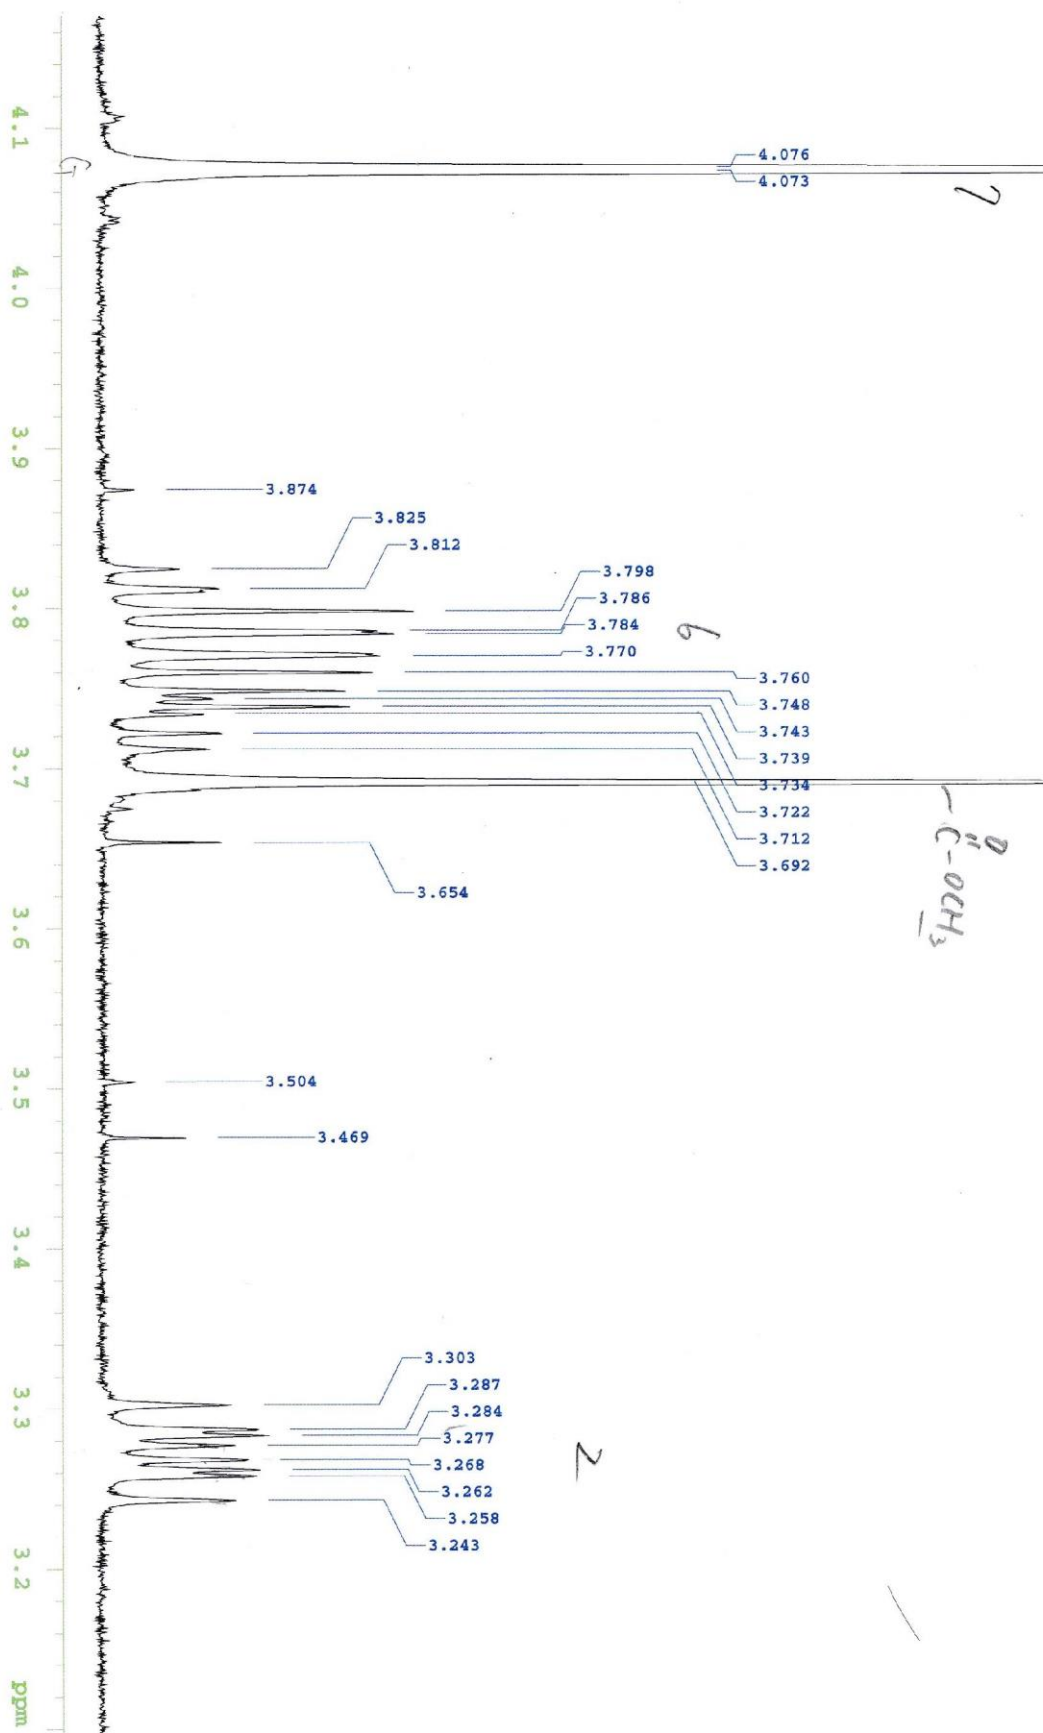

R-3

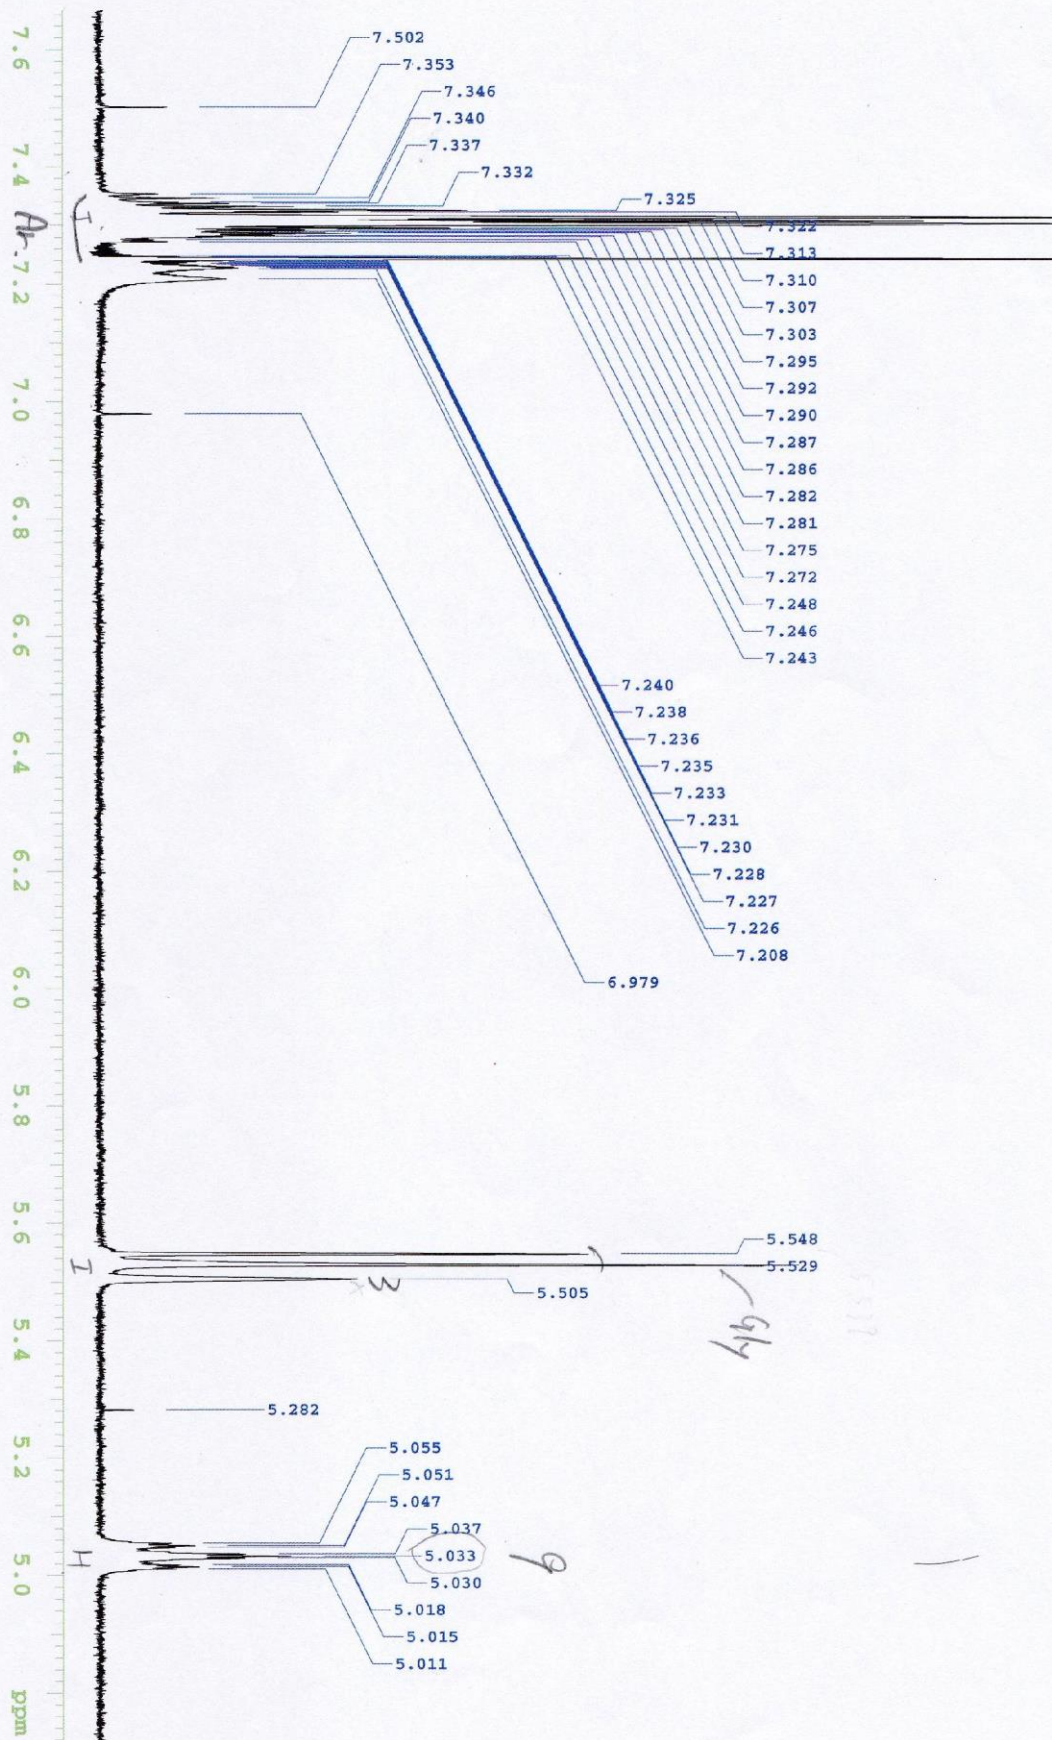

Figure S27  $^1\text{H}$  NMR spectra of 2b in  $\text{CDCl}_3$

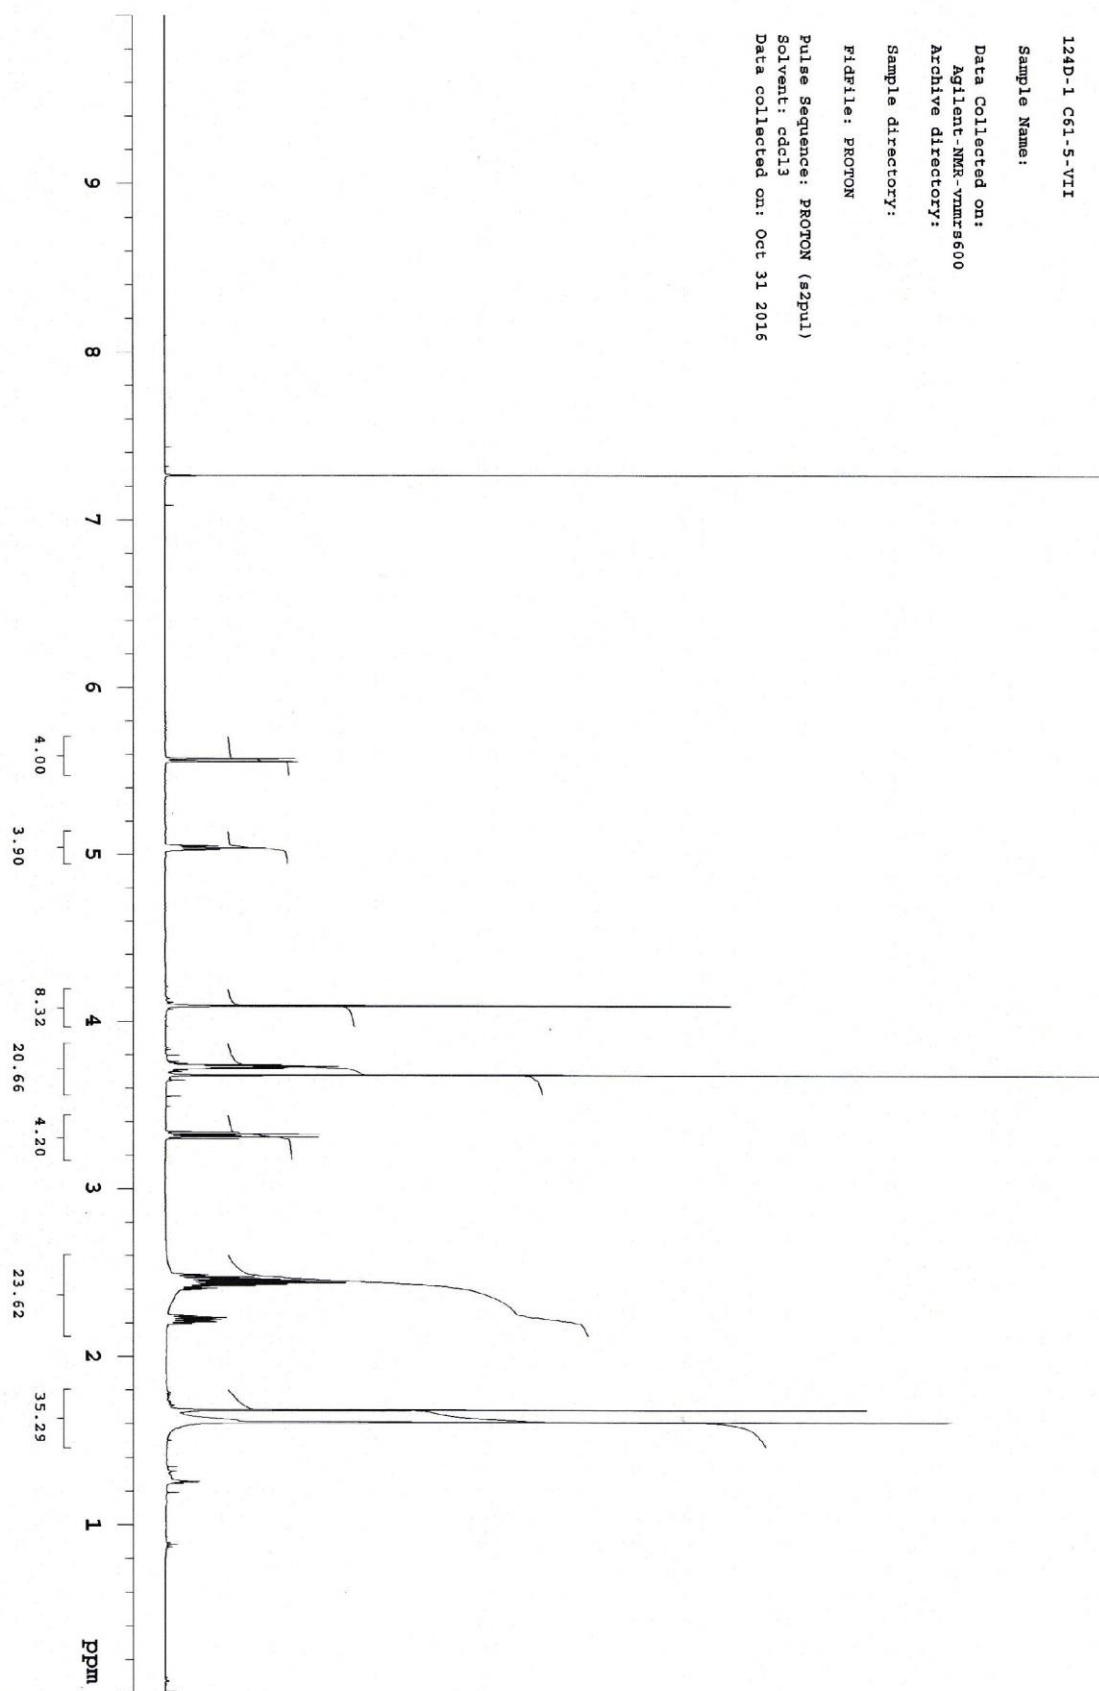

Supplement: s1 [file s1]
